# Supplementary material for: In Vitro and In Silico Anti-Acetylcholinesterase Activity from Macaranga tanarius and Syzygium jambos
Source: MDPI journal article supplement (doi:10.3390/molecules27092648), 2022-04-20
Supplement: s1 [file s1]

## Supplementary information

# In Vitro and In Silico Anti-Acetylcholinesterase Activity from *Macaranga tanarius* and *Syzygium jambos*

Mira Syahfrienra Amir Rawa <sup>1,2,3</sup>, Nurul Amira Nurul Azman <sup>3</sup>, Suriani Mohamad <sup>3</sup>, Toshihiko Nogawa <sup>2,3,\*</sup> and Habibah A. Wahab <sup>1,3,\*</sup>

<sup>1</sup> Collaborative Laboratory for Herbal Standardization (CHEST), School of Pharmaceutical Sciences, Universiti Sains Malaysia, 11800 Penang, Malaysia; [mirasyah@usm.my](mailto:mirasyah@usm.my)

<sup>2</sup> Chemical Biology Research Group, RIKEN Center for Sustainable Resource Science, 2-1 Hirosawa, Wako, Saitama, 351-0198, Japan

<sup>3</sup> USM-RIKEN Interdisciplinary Collaboration for Advanced Sciences (URICAS), Universiti Sains Malaysia, 11800 Penang, Malaysia; [nurulamira.nazman@gmail.com](mailto:nurulamira.nazman@gmail.com) (N.A.N.A.); [suriani@usm.my](mailto:suriani@usm.my) (S.M.)

\* Correspondence: [nogawat@riken.jp](mailto:nogawat@riken.jp) (T.N.); [habibahw@usm.my](mailto:habibahw@usm.my) (H.A.W.); Tel.: +81-048-467-9541 (T.N.); +604-657-7888 (H.A.W.)

## Contents:

- Figure S1.** Anti-acetylcholinesterase (AChE) activity of 18 potent Malaysian plant fractions (hexane, ethyl acetate, butanol, water) at 50 µg/mL final concentration. / page 4
- Figure S2.** Isolation scheme of *Macaranga tanarius* ethyl acetate extract. / page 5
- Figure S3.** Isolation scheme of *Syzygium jambos* hexane extract. / page 6
- Figure S4.** <sup>1</sup>H NMR spectrum of **1**. / page 7
- Figure S5.** <sup>1</sup>H NMR spectrum of **2**. / page 8
- Figure S6.** <sup>1</sup>H NMR spectrum of **3**. / page 9
- Figure S7.** <sup>1</sup>H NMR spectrum of **4**. / page 10
- Figure S8.** <sup>1</sup>H NMR spectrum of **5**. / page 11
- Figure S9.** <sup>13</sup>C NMR spectrum of **1**. / page 12
- Figure S10.** <sup>13</sup>C NMR spectrum of **2**. / page 13
- Figure S11.** <sup>13</sup>C NMR spectrum of **3**. / page 14
- Figure S12.** <sup>13</sup>C NMR spectrum of **4**. / page 15
- Figure S13.** <sup>13</sup>C NMR spectrum of **5**. / page 16
- Figure S14.** DEPT135 spectrum of **1**. / page 17
- Figure S15.** DEPT135 spectrum of **3**. / page 18
- Figure S16.** DEPT135 spectrum of **4**. / page 19
- Figure S17.** DEPT135 spectrum of **5**. / page 20
- Figure S18.** HSQC spectrum of **1**. / page 21
- Figure S19.** HSQC spectrum of **2**. / page 22
- Figure S20.** HSQC spectrum of **3**. / page 23
- Figure S21.** HSQC spectrum of **4**. / page 24
- Figure S22.** HSQC spectrum of **5**. / page 25
- Figure S23.** DQF-COSY spectrum of **1**. / page 26
- Figure S24.** DQF-COSY spectrum of **3**. / page 27
- Figure S25.** DQF-COSY spectrum of **5**. / page 28
- Figure S26.** HMBC spectrum of **1**. / page 29
- Figure S27.** HMBC spectrum of **3**. / page 30
- Figure S28.** HMBC spectrum of **4**. / page 31
- Figure S29.** HMBC spectrum of **5**. / page 32
- Figure S30.** ESI-MS spectrum of **1** by UPLC-MS analysis. / page 33
- Figure S31.** ESI-MS spectrum of **2** by UPLC-MS analysis. / page 34
- Figure S32.** ESI-MS spectrum of **3** by UPLC-MS analysis. / page 35

**Figure S33.** ESI-MS spectrum of **4** by UPLC-MS analysis. / page 36

**Figure S34.** ESI-MS spectrum of **5** by UPLC-MS analysis. / page 37

**Figure S35.** UV spectra of **1**, **2**, and **3** by UPLC-MS analysis. / page 38

**Figure S36.** UV spectra of **4** and **5** by UPLC-MS analysis. / page 39

**Table S1.** Physicochemical properties of **1** – **5**. / page 40

**Table S2.** Comparison of NMR chemical shifts of **1** with reported compounds, solophenol A and nymphaeol C. / page 41

**Table S3.** Comparison of NMR chemical shifts of **2** with reported compound, nymphaeol B. / page 42

**Table S4.** Comparison of NMR chemical shifts of **3** with reported compound, schizolaenone C. / page 43

**Table S5.** Comparison of NMR chemical shifts of **4** with reported compound, SB-202742. / page 44

**Table S6.** Comparison of NMR chemical shifts of **5** with reported compound, 6-heptadeca-9Z,12Z-dienyl salicylic acid. / page 45

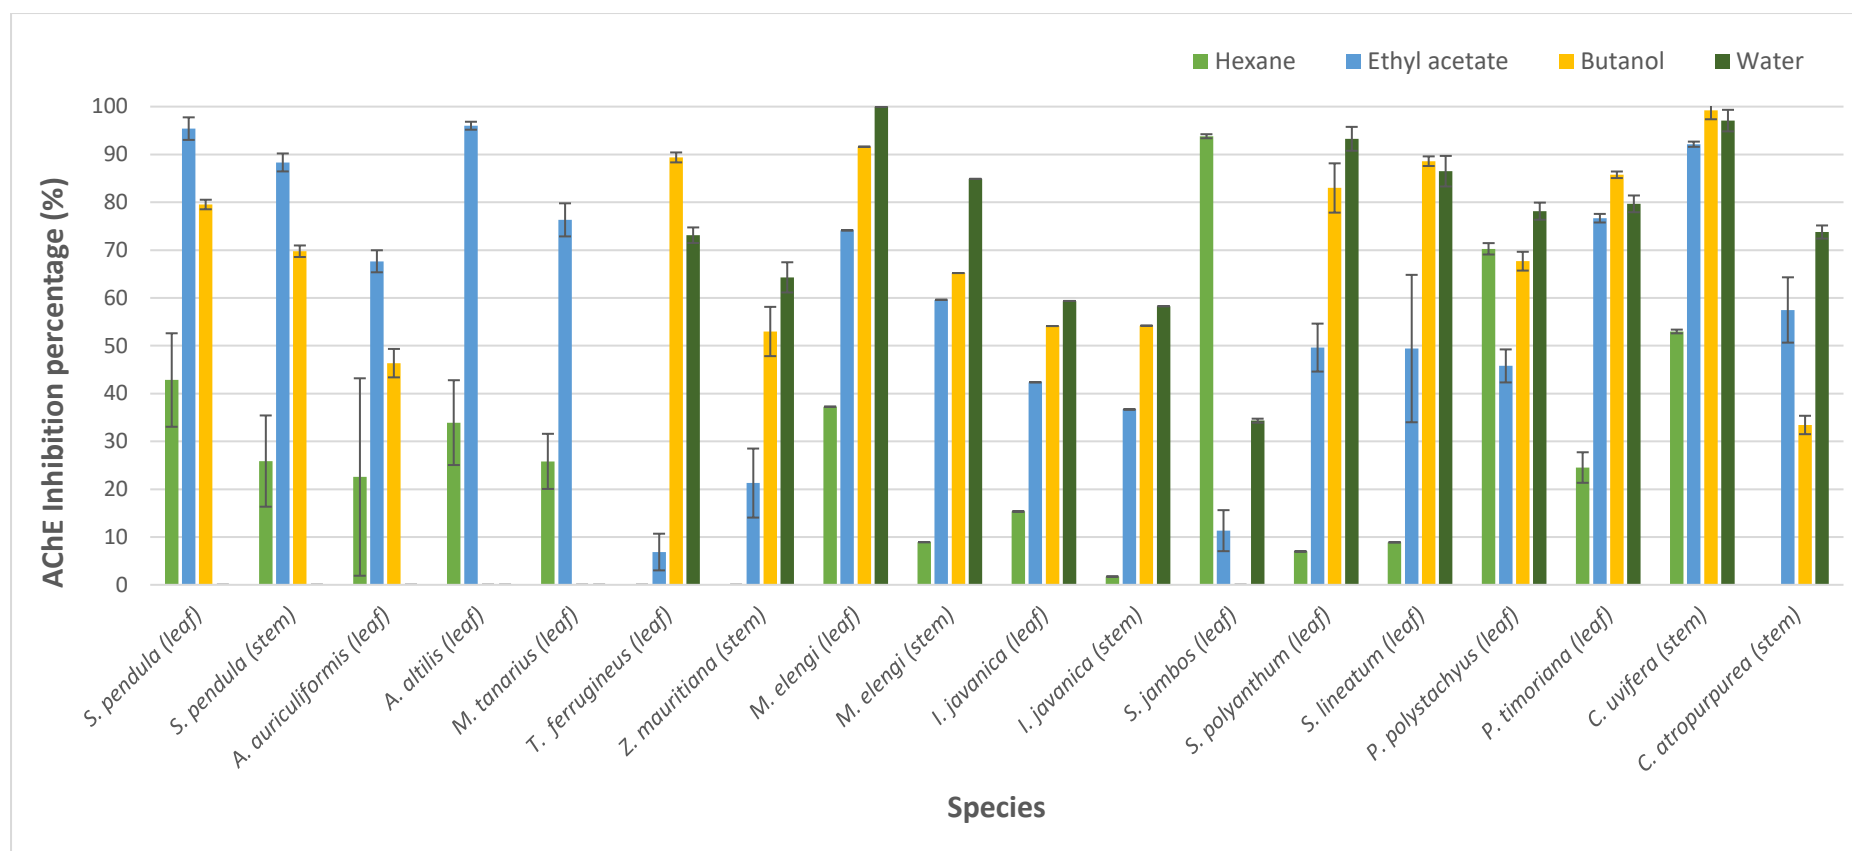

**Figure S1.** Anti-acetylcholinesterase (AChE) activity of 18 potent Malaysian plant fractions (hexane, ethyl acetate, butanol, water) at 50  $\mu\text{g/mL}$  final concentration [10]. *M. tanarius* and *S. jambos* were chosen for isolation based on their low molecular weight active constituents with no report of identification of AChE inhibitors from these species before.

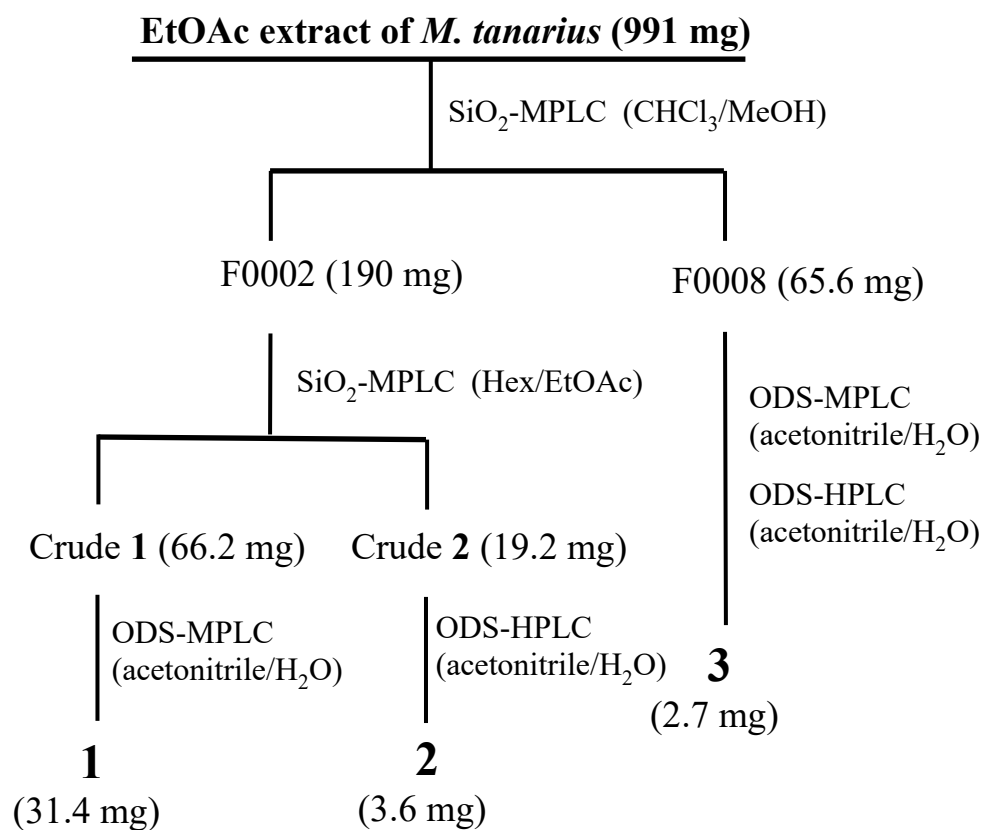

**Figure S2.** Isolation scheme of *Macaranga tanarius* ethyl acetate extract.

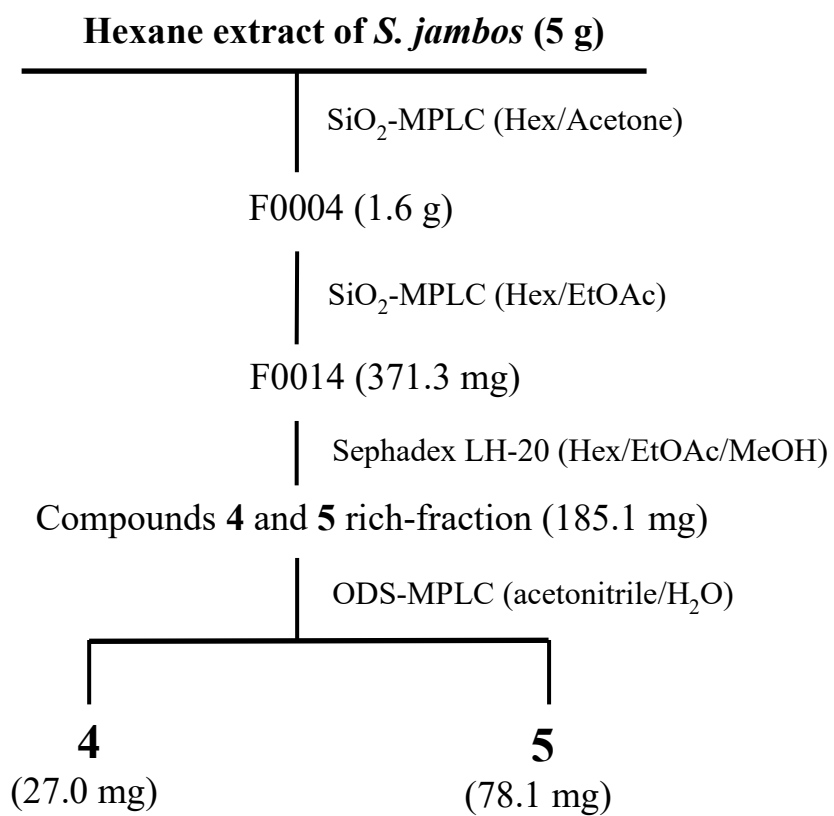

**Figure S3.** Isolation scheme of *Syzygium jambos* hexane extract.

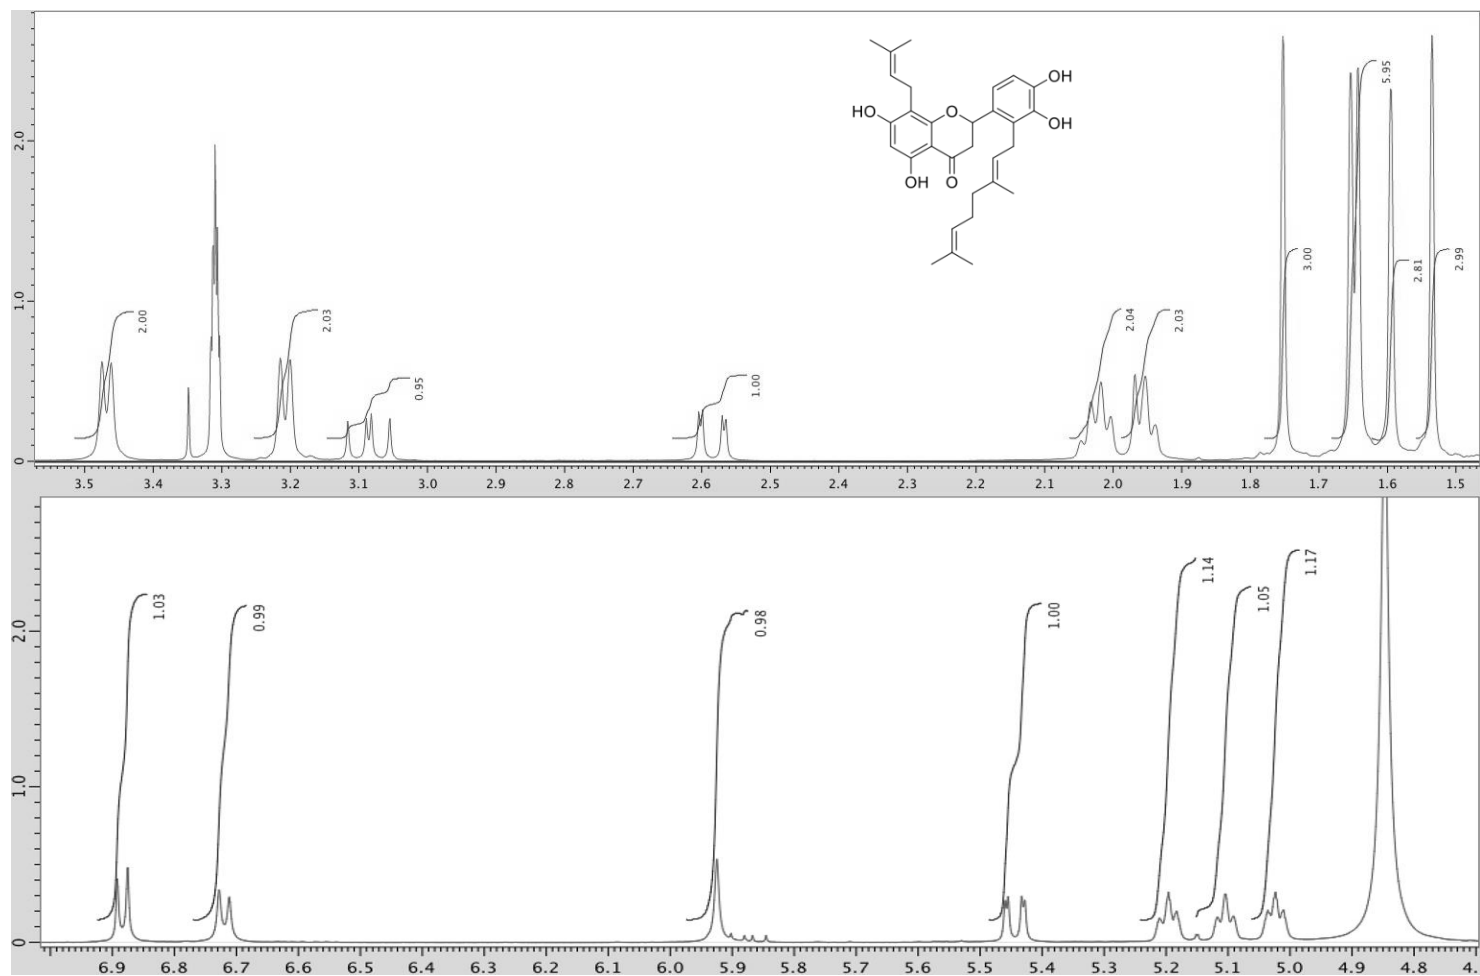

**Figure S4.**  $^1\text{H}$ -NMR spectrum of **1**.

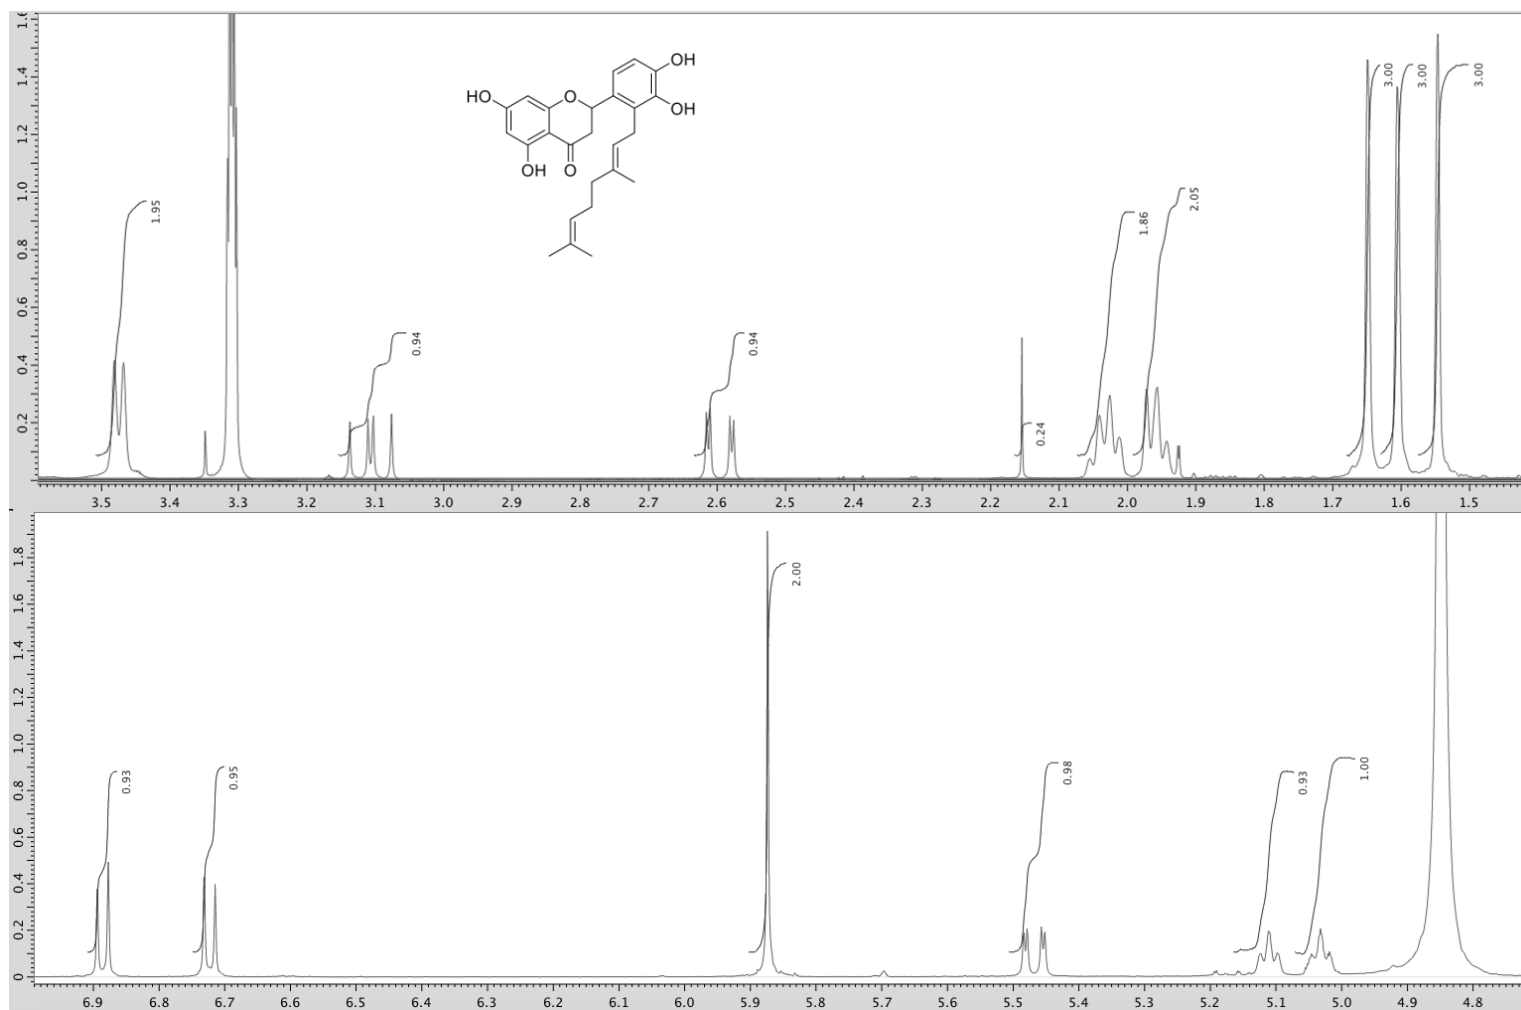

Figure S5.  $^1\text{H}$ -NMR spectrum of **2**.

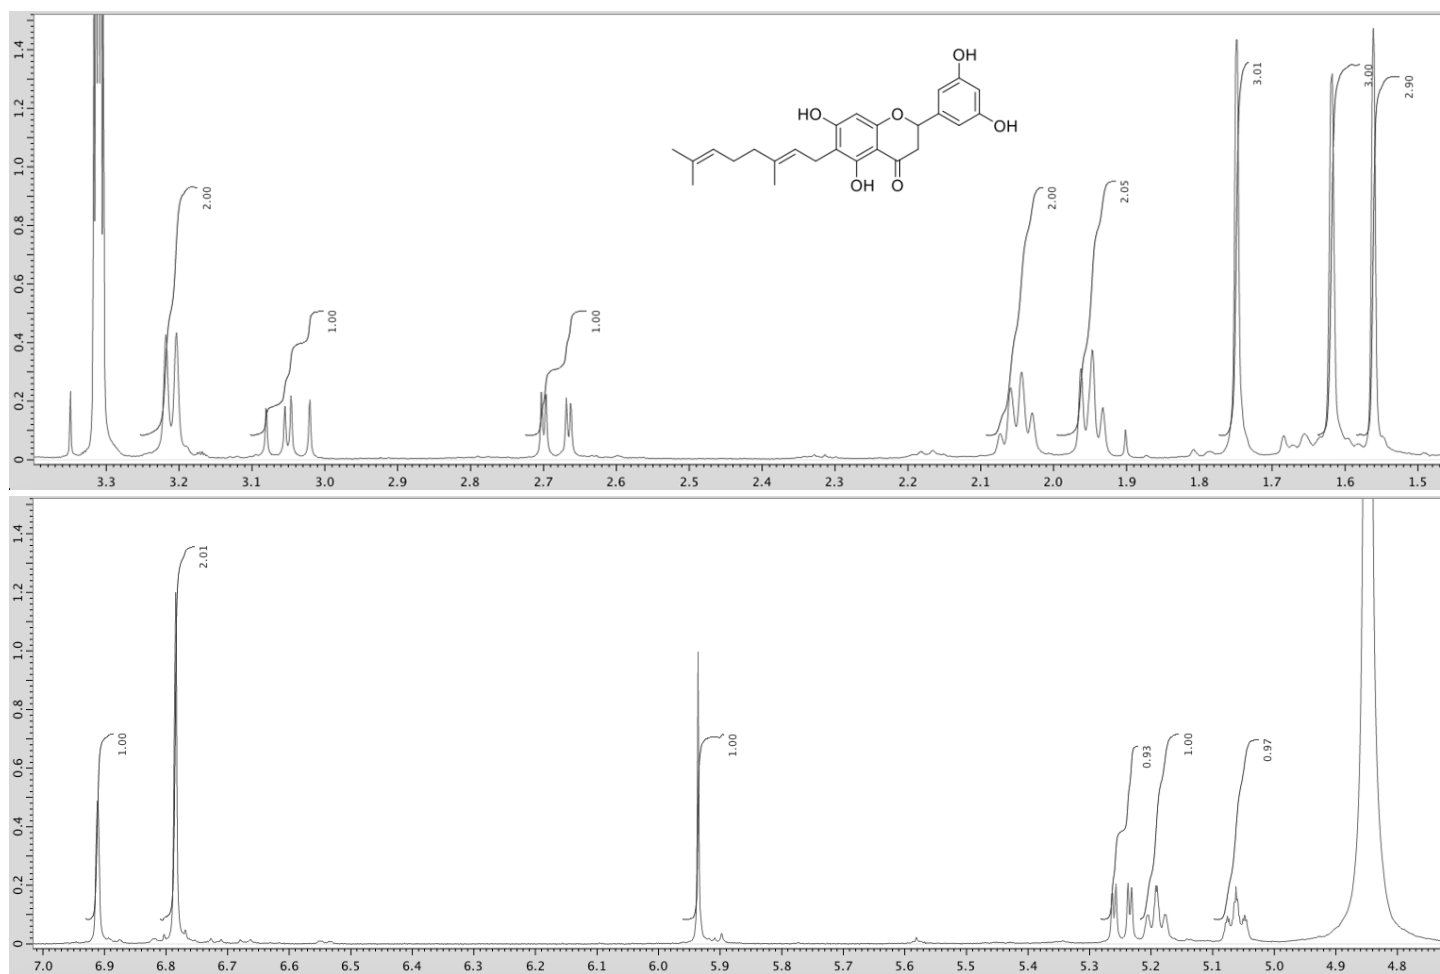

Figure S6.  $^1\text{H}$ -NMR spectrum of **3**.

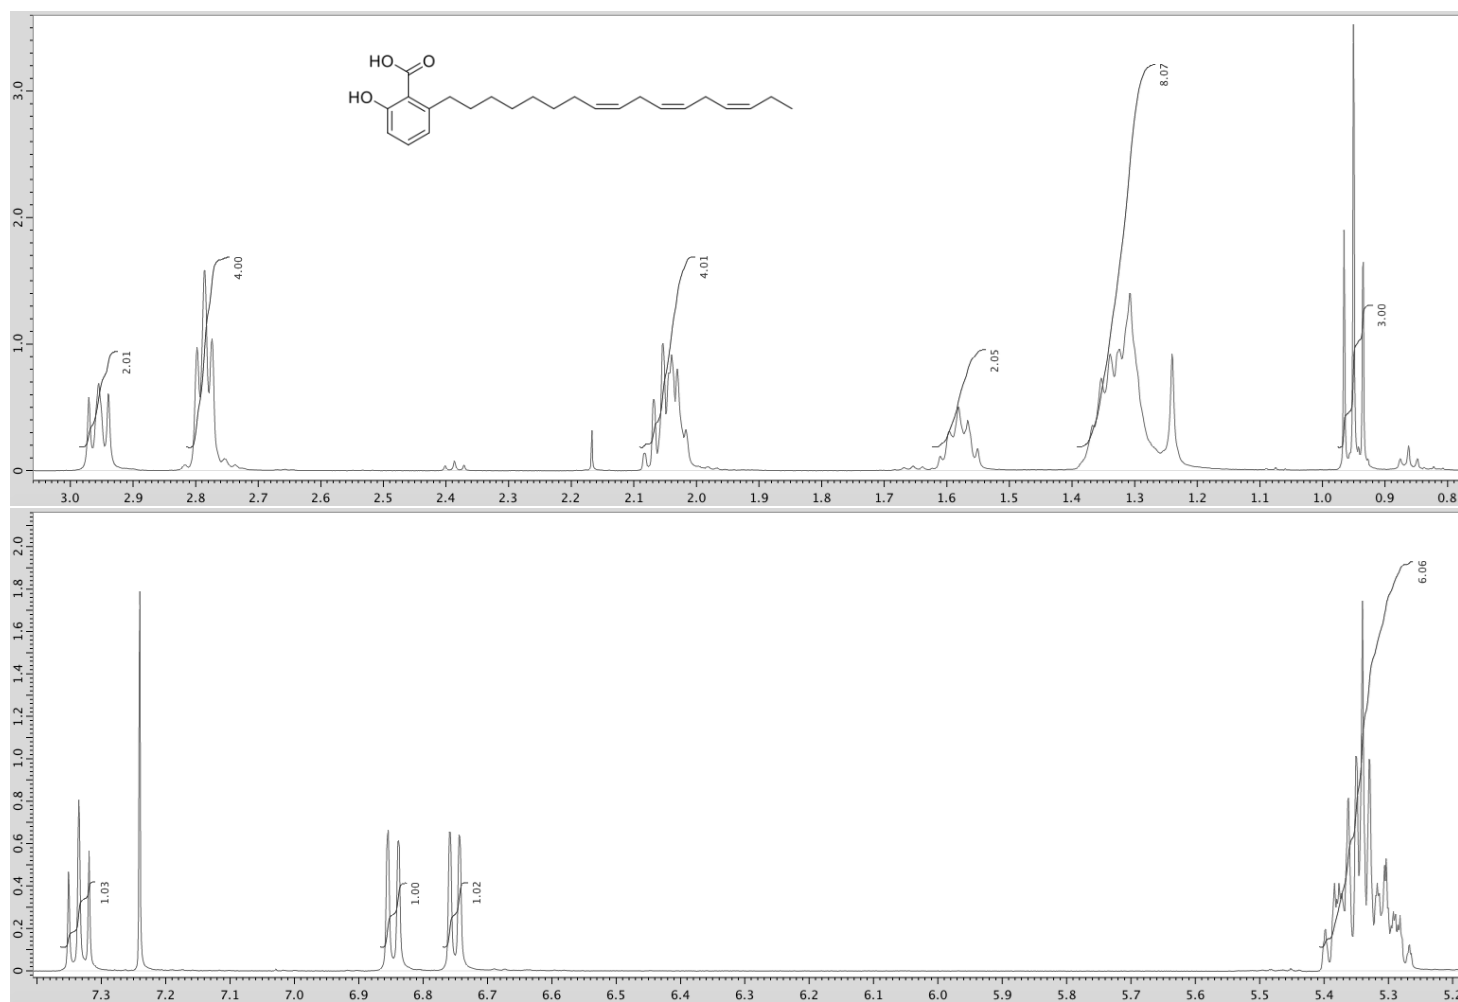

**Figure S7.**  $^1\text{H}$ -NMR spectrum of **4**.

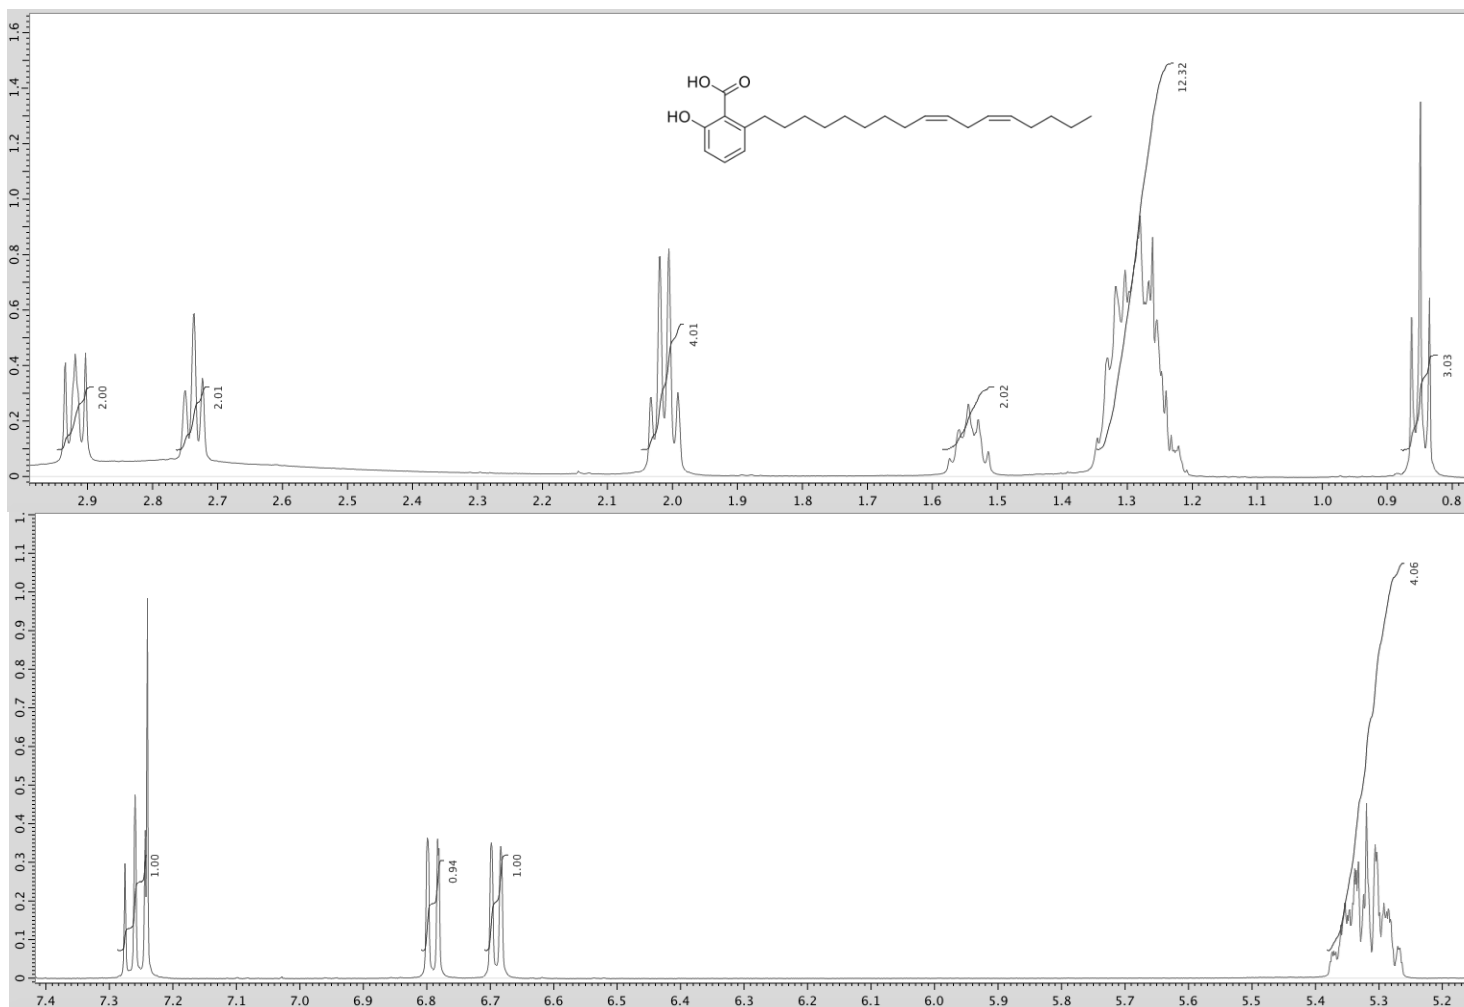

Figure S8.  $^1\text{H}$ -NMR spectrum of **5**.

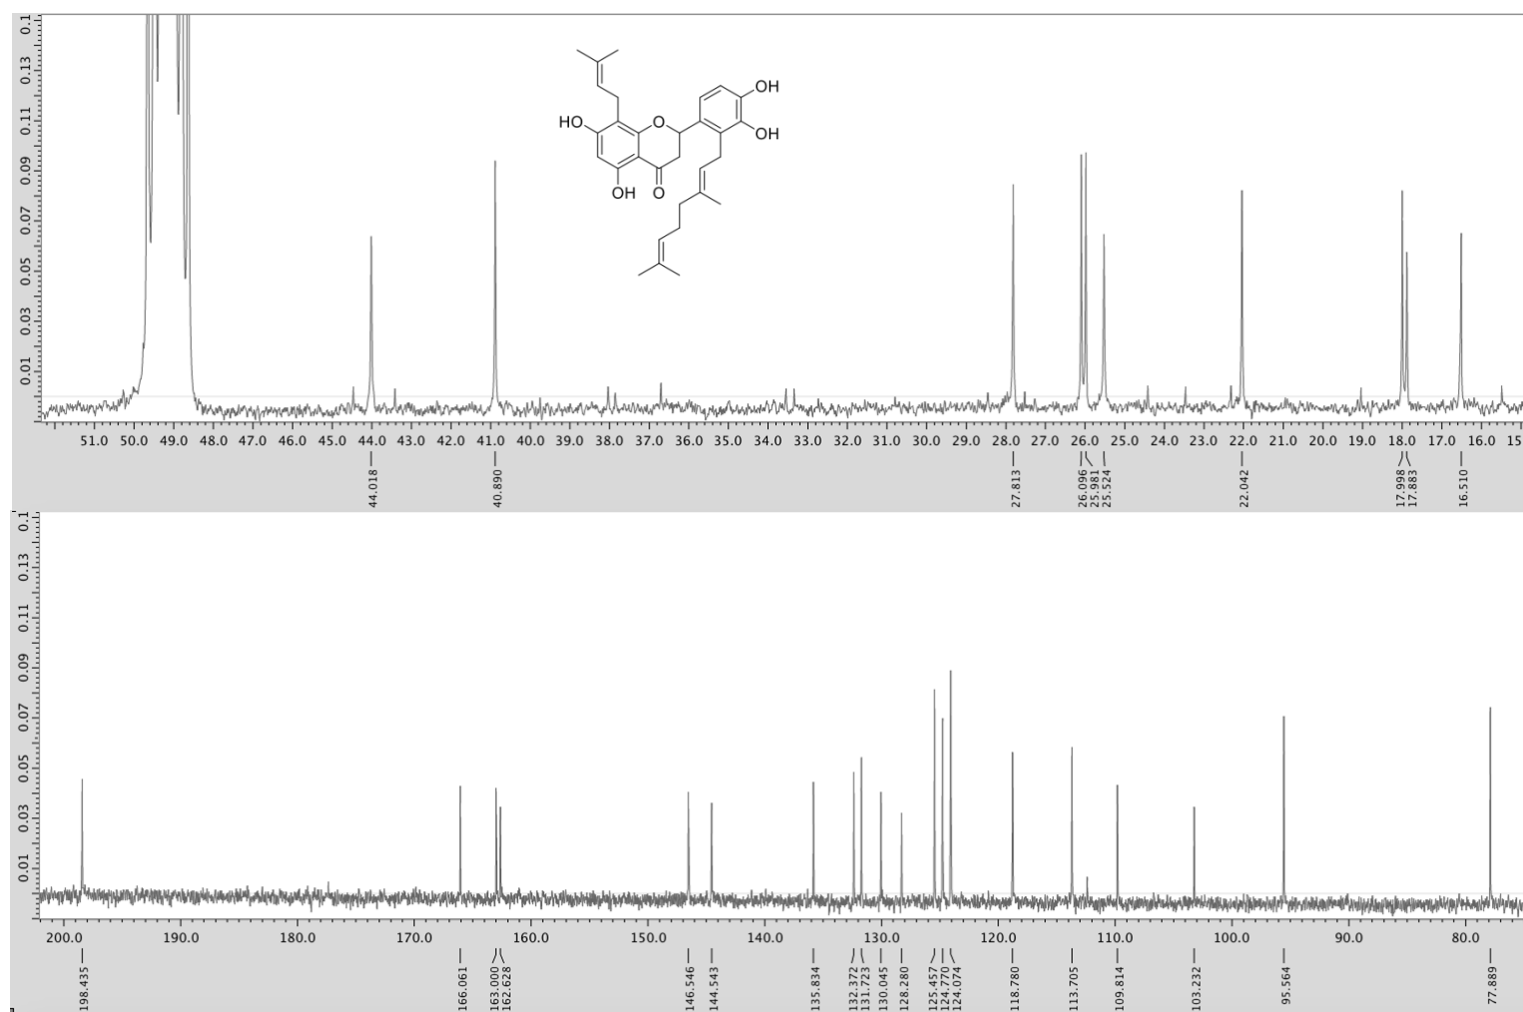

Figure S9. <sup>13</sup>C-NMR spectrum of 1.

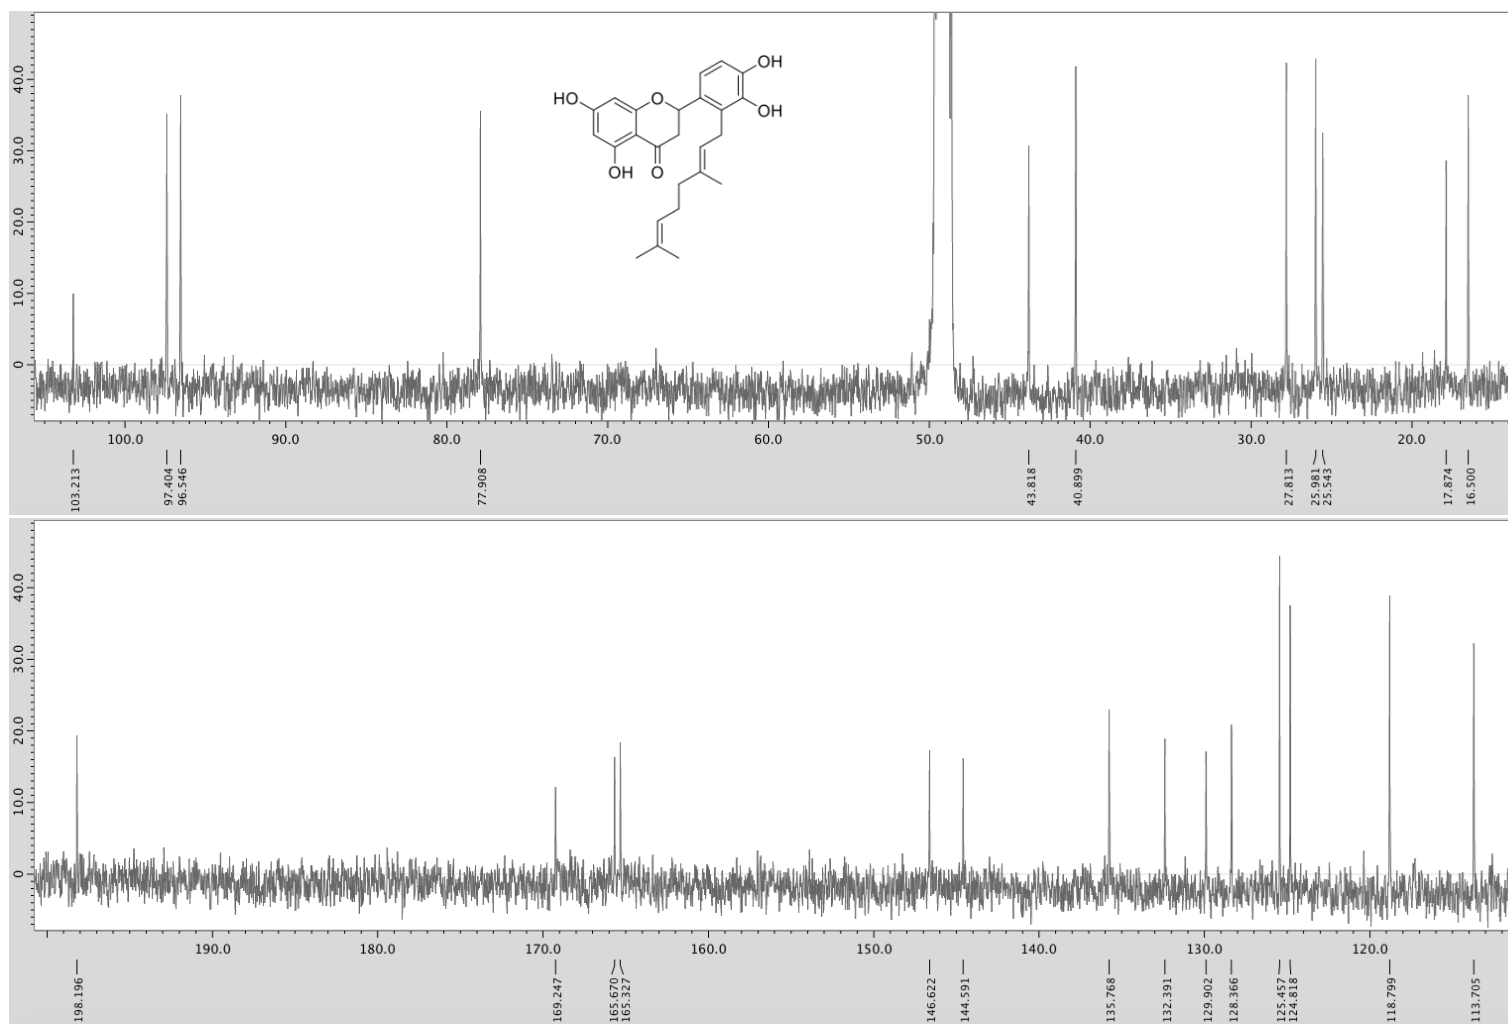

Figure S10.  $^{13}\text{C}$ -NMR spectrum of **2**.

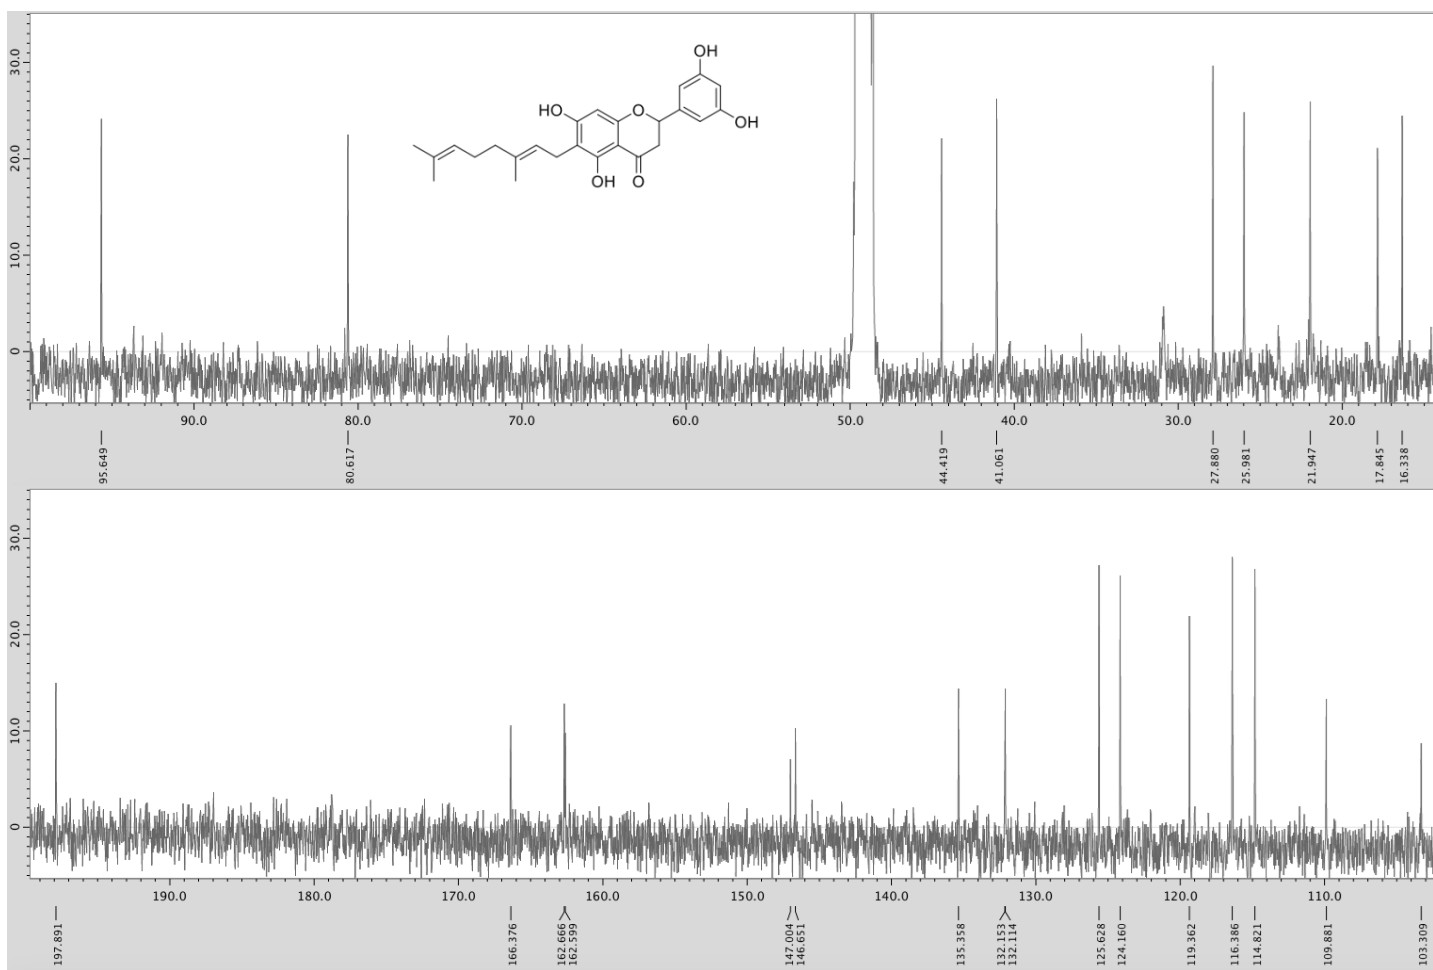

Figure S11.  $^{13}\text{C}$ -NMR spectrum of **3**.

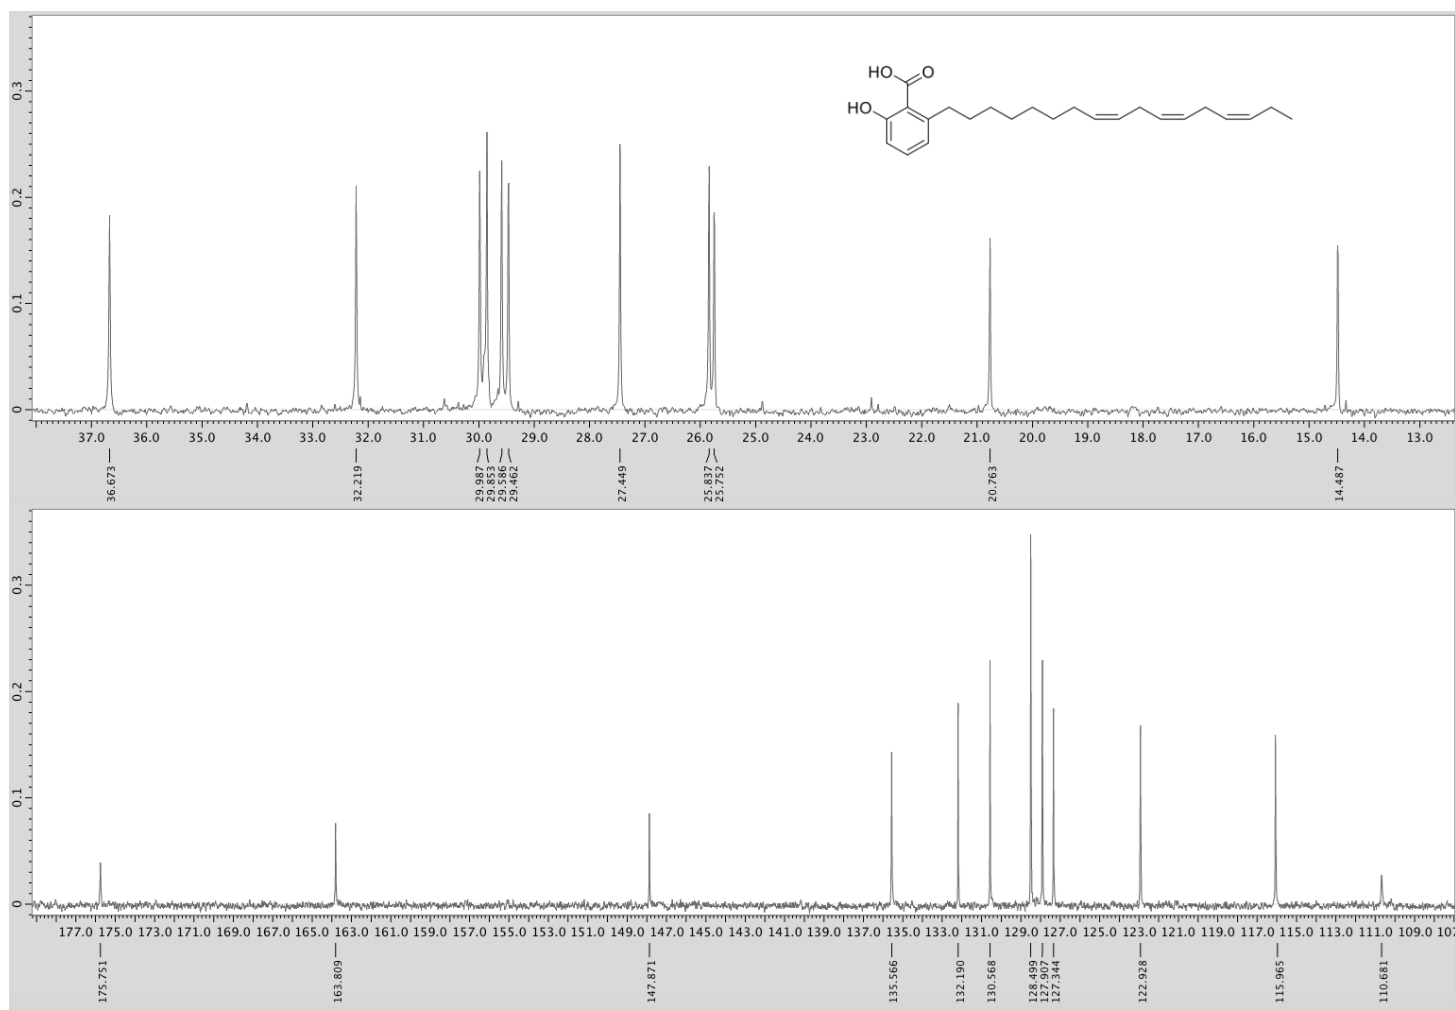

Figure S12. <sup>13</sup>C-NMR spectrum of 4.

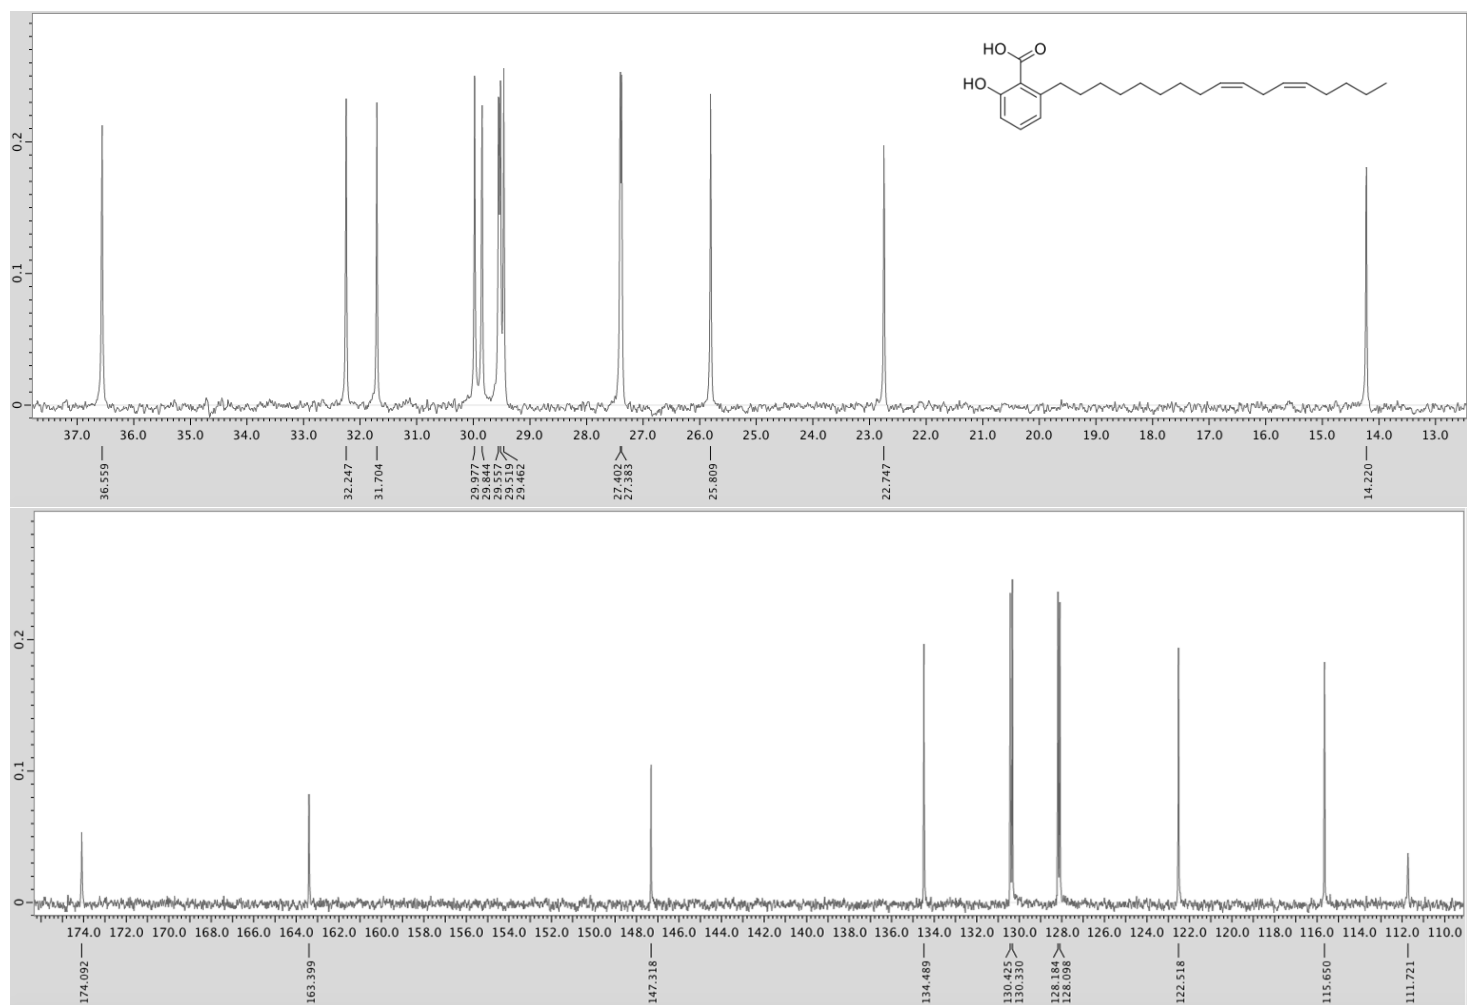

Figure S13.  $^{13}\text{C}$ -NMR spectrum of 5.

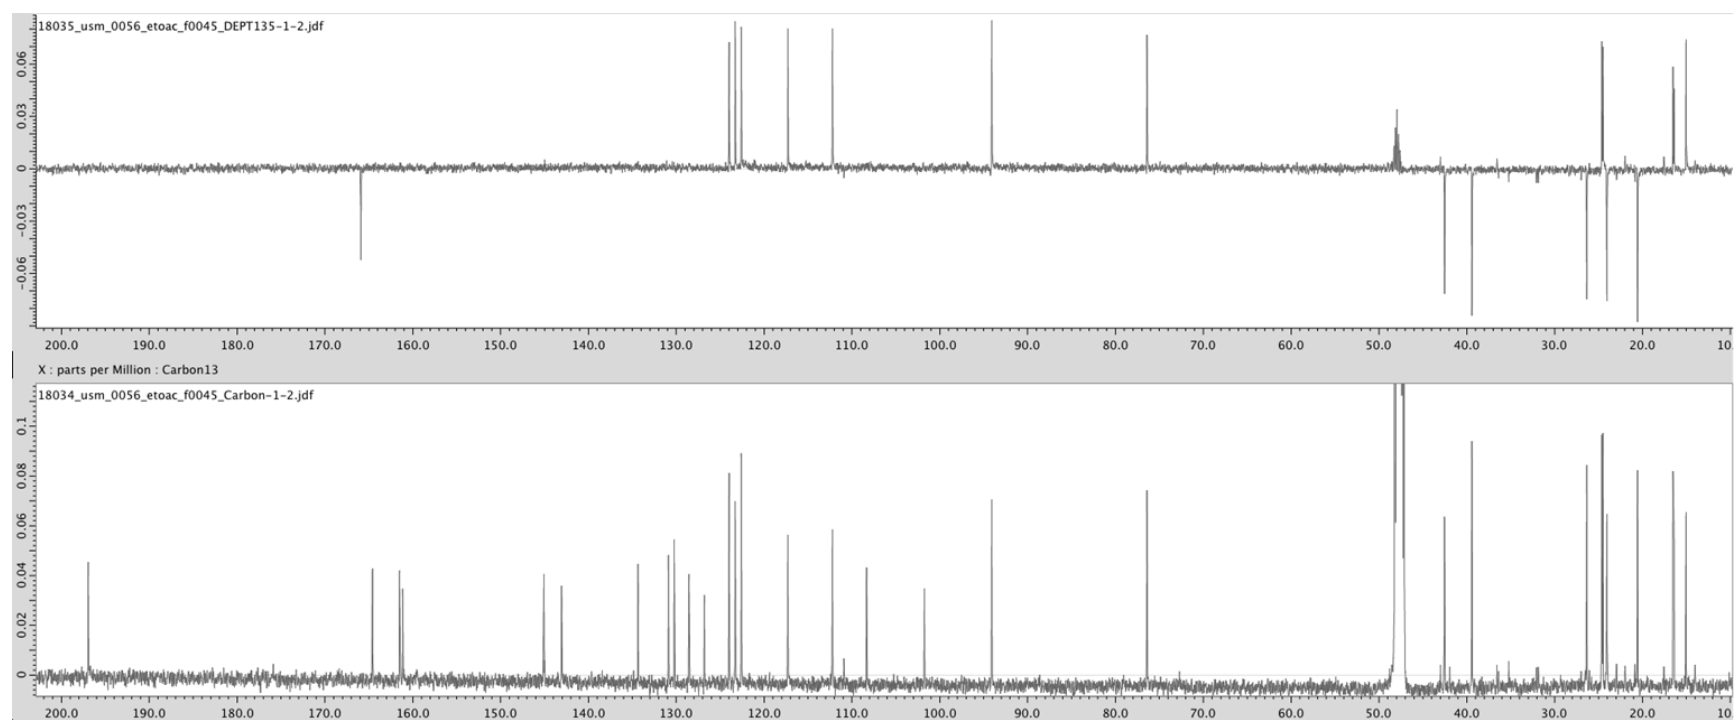

**Figure S14.** DEPT-135 spectrum of **1**.

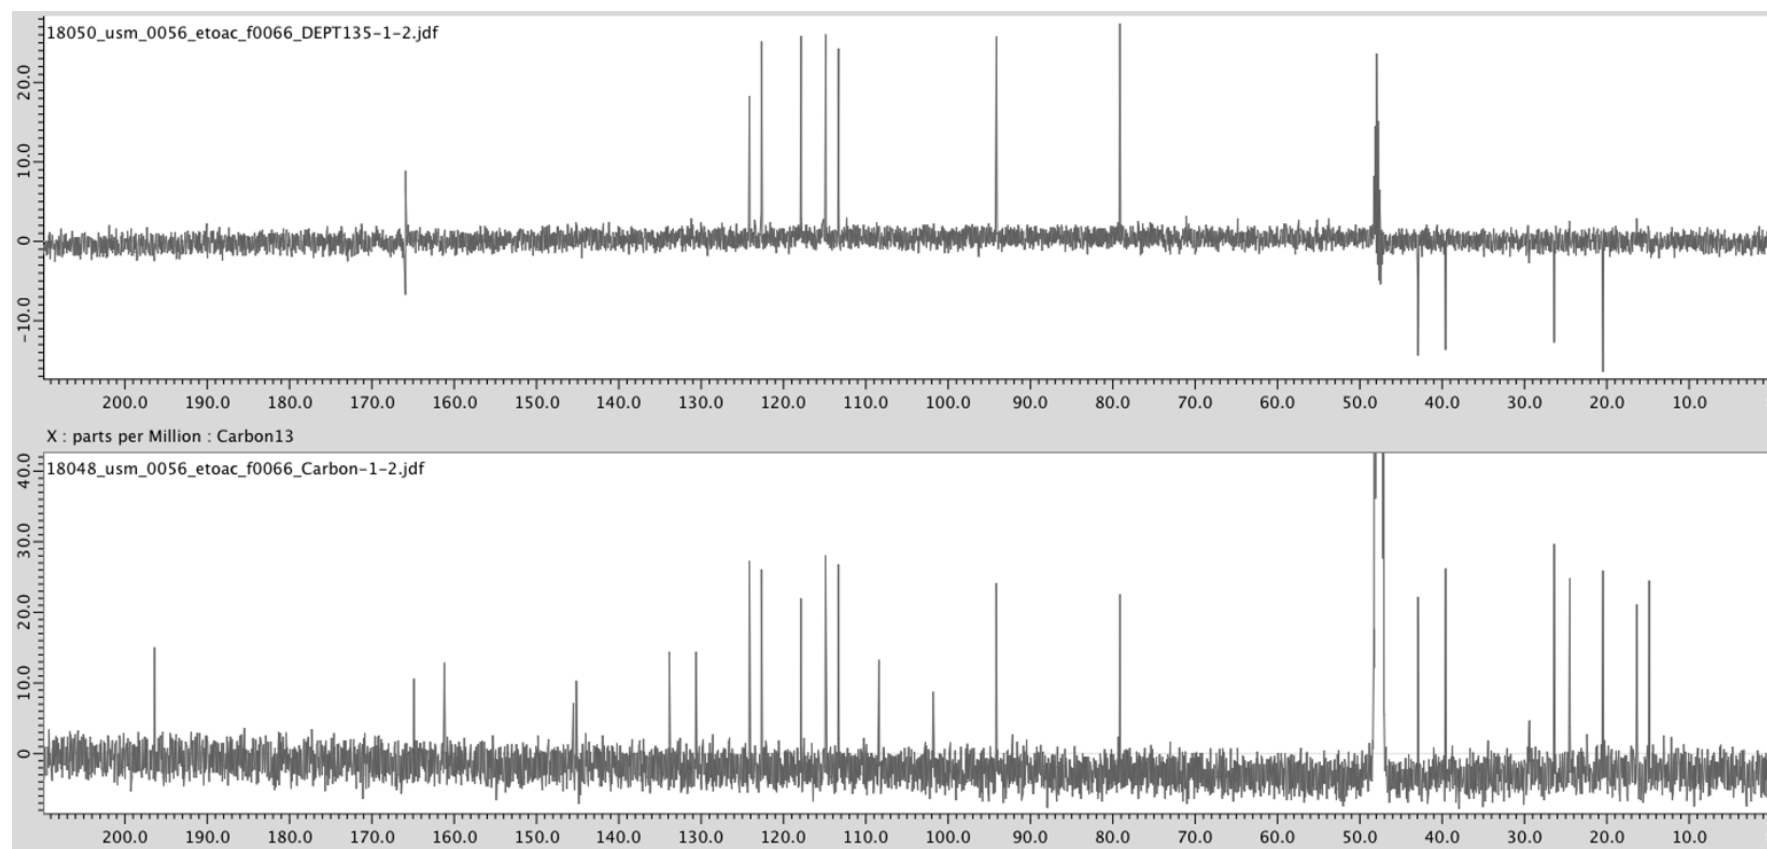

**Figure S15.** DEPT-135 spectrum of **3**.

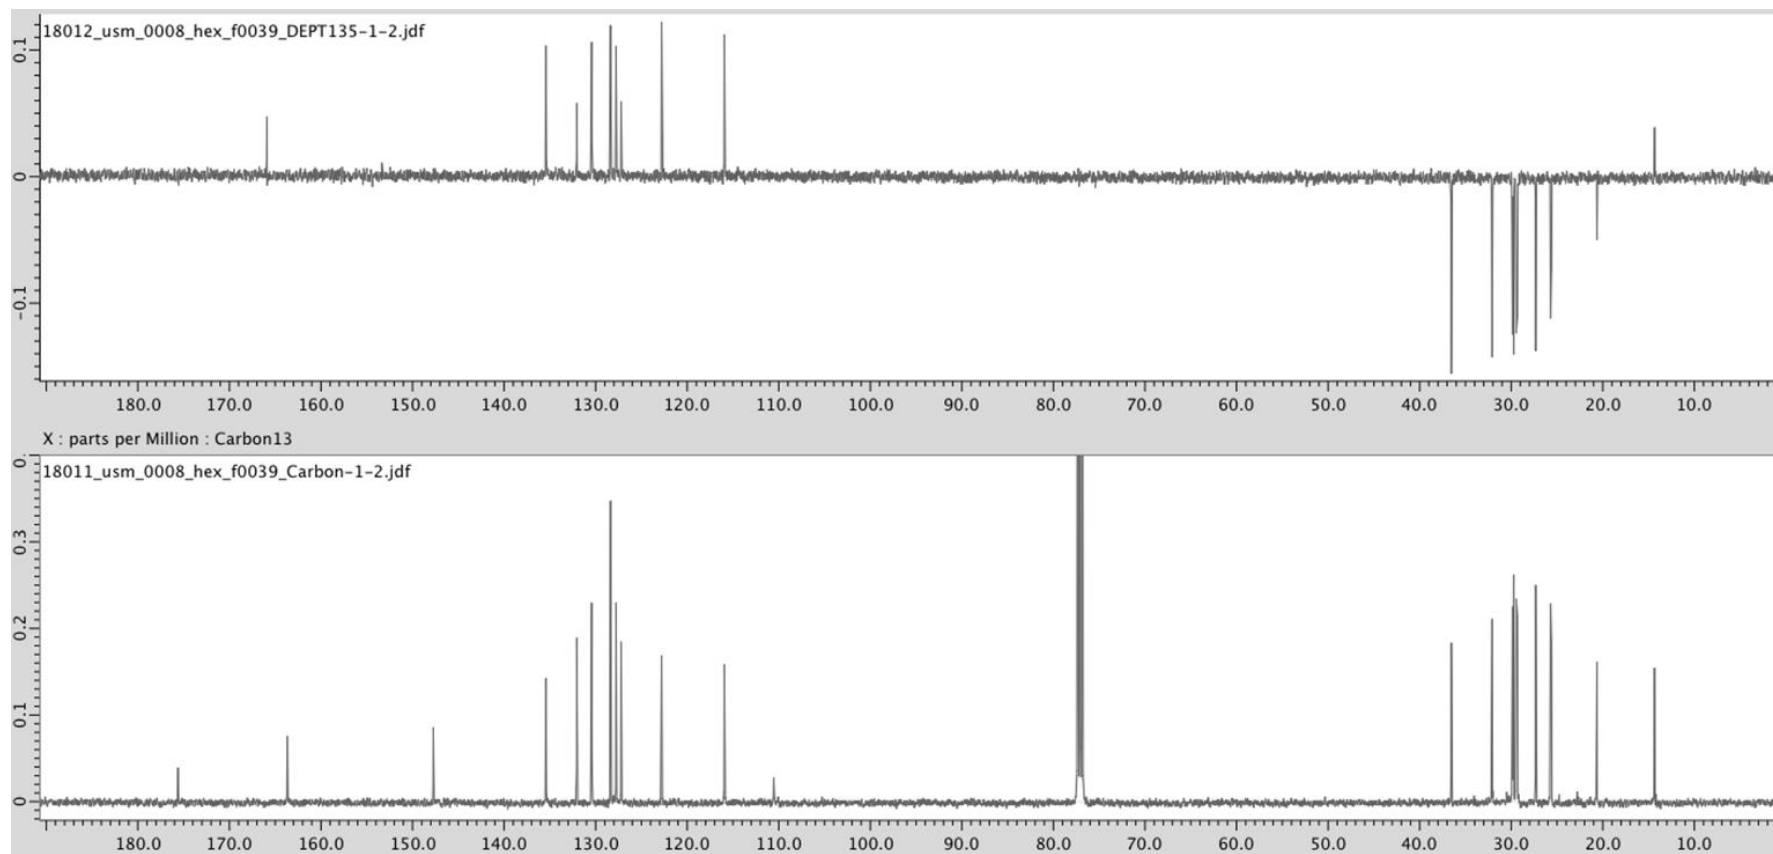

**Figure S16.** DEPT-135 spectrum of **4**.

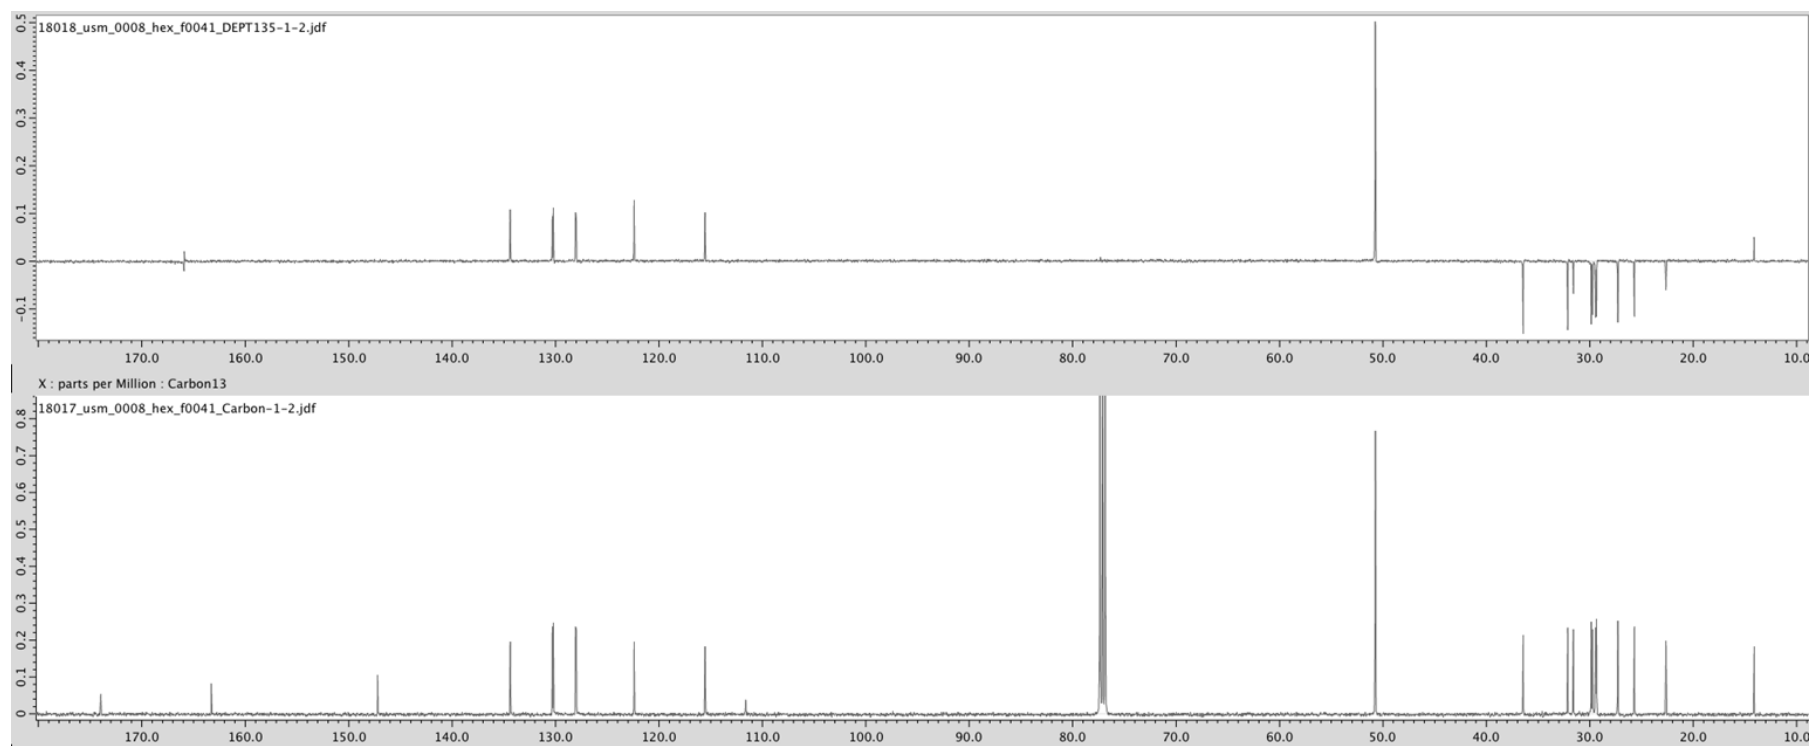

**Figure S17.** DEPT-135 spectrum of **5**.

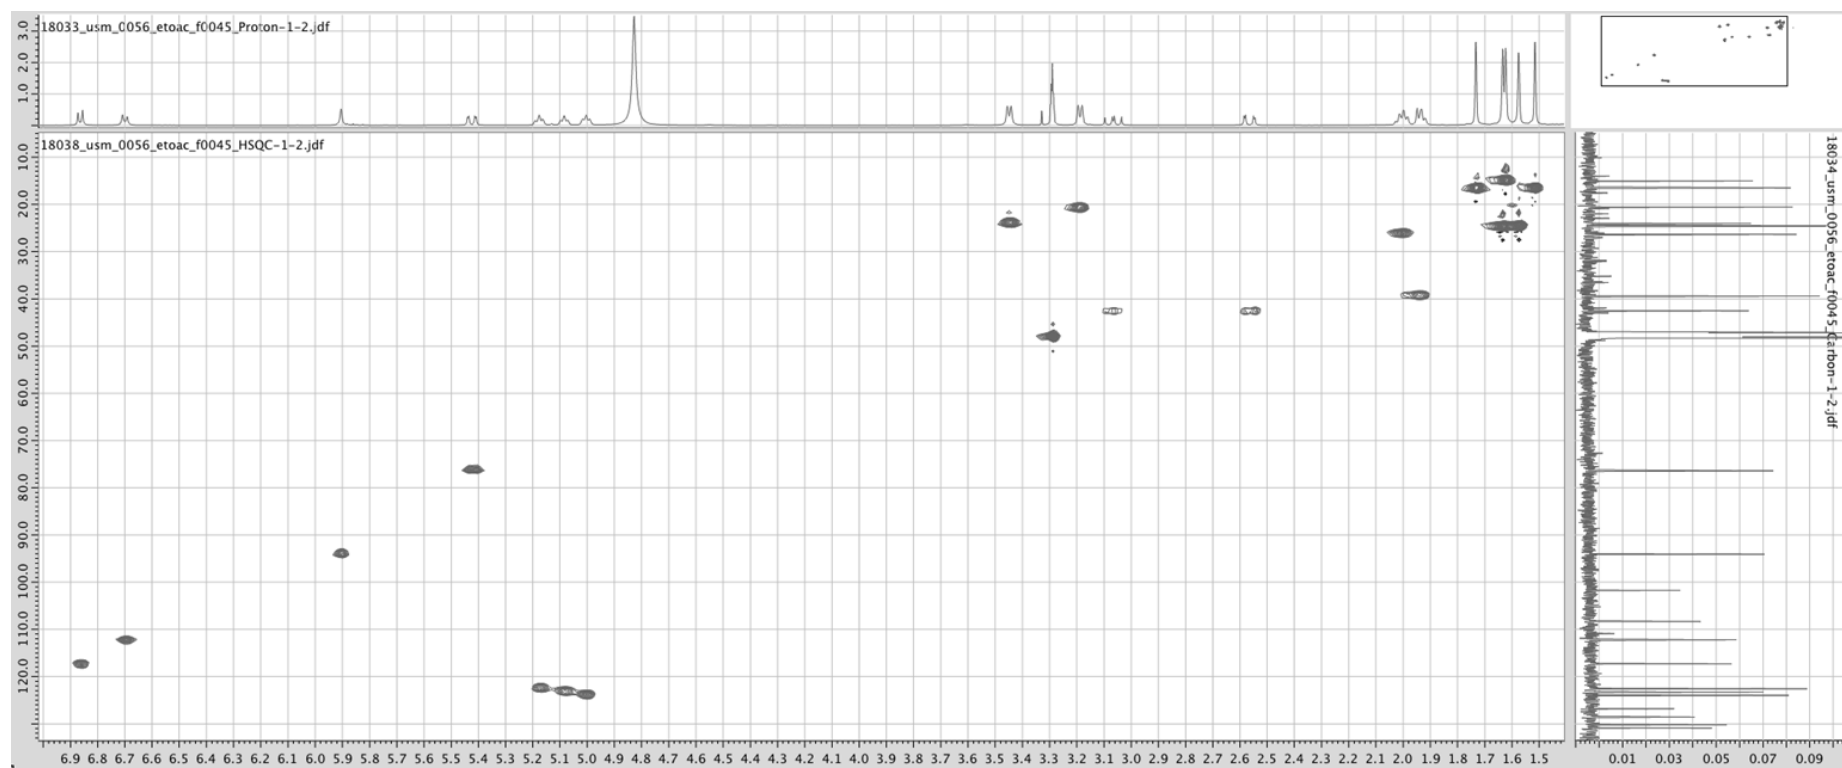

Figure S18. HSQC spectrum of **1**.

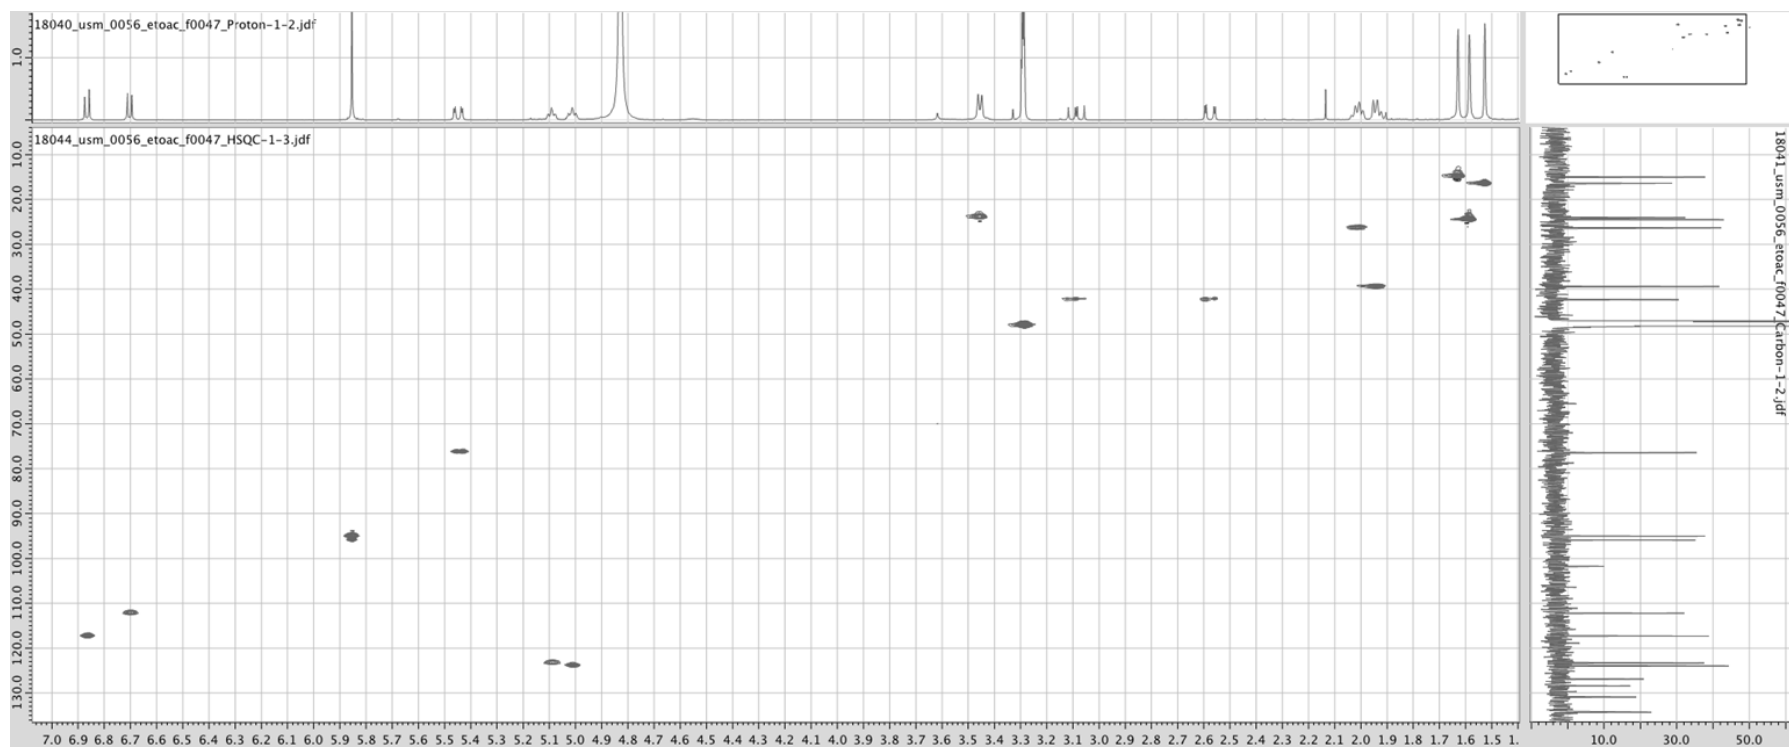

**Figure S19.** HSQC spectrum of **2**.

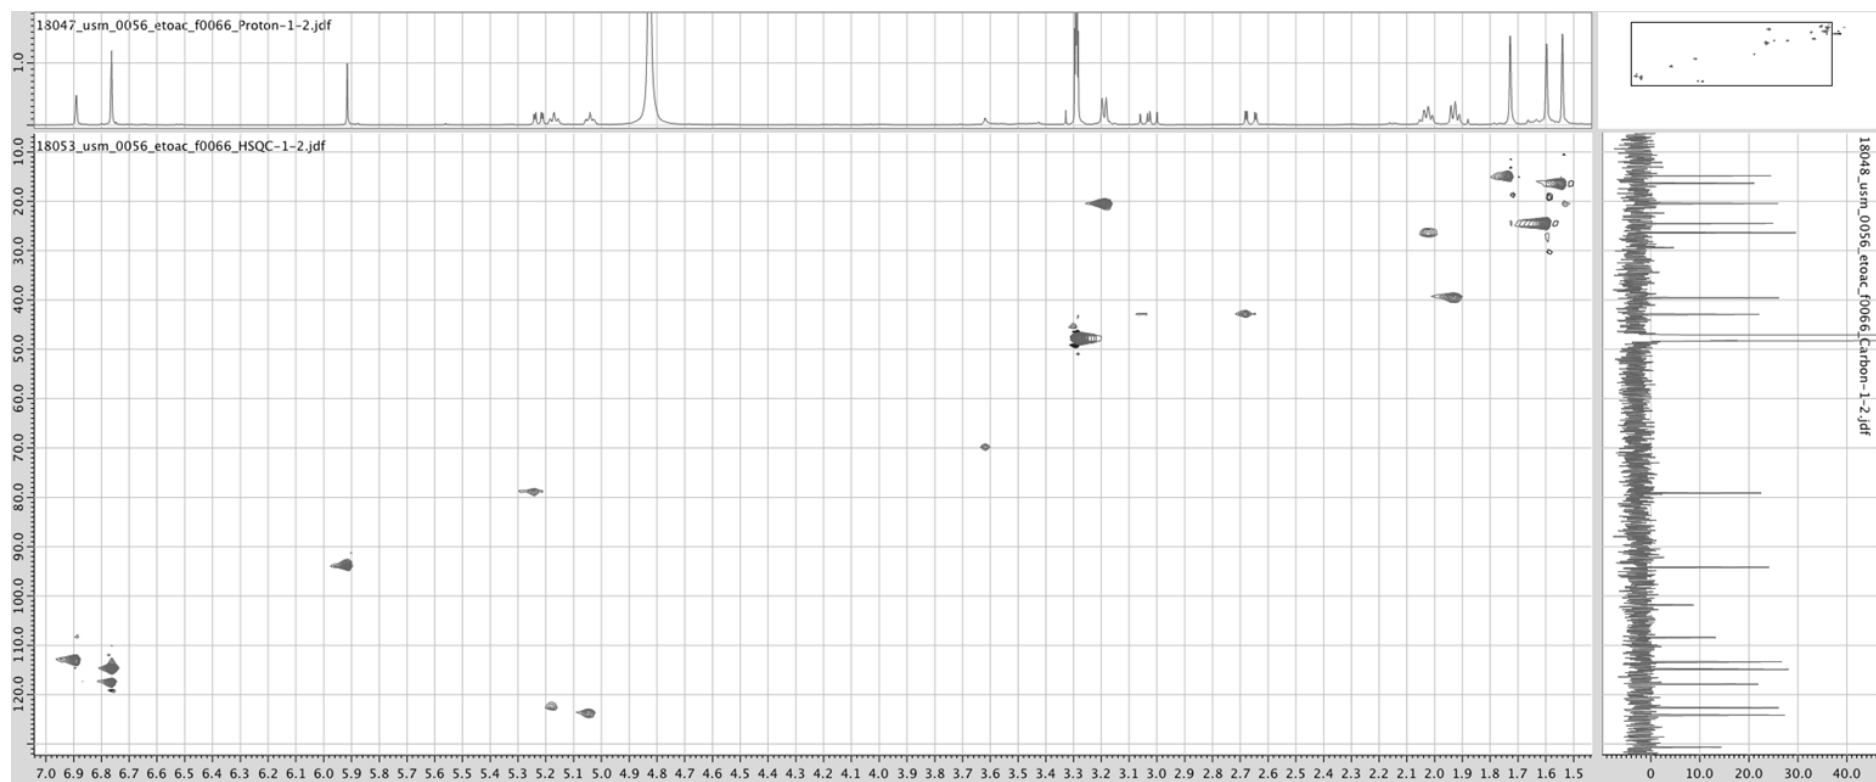

**Figure S20.** HSQC spectrum of **3**.

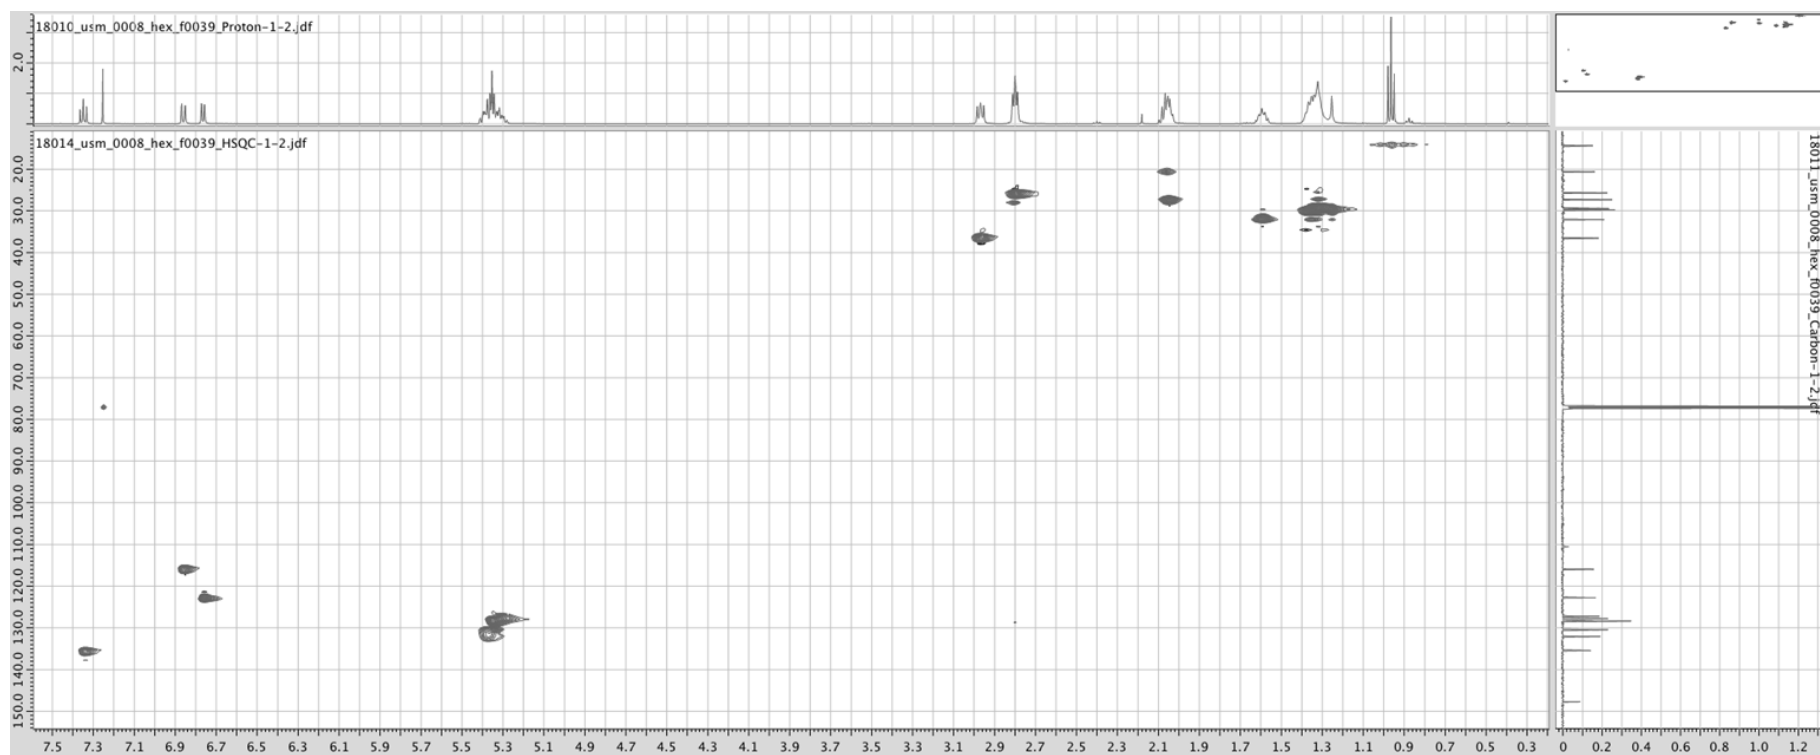

**Figure S21.** HSQC spectrum of **4**.

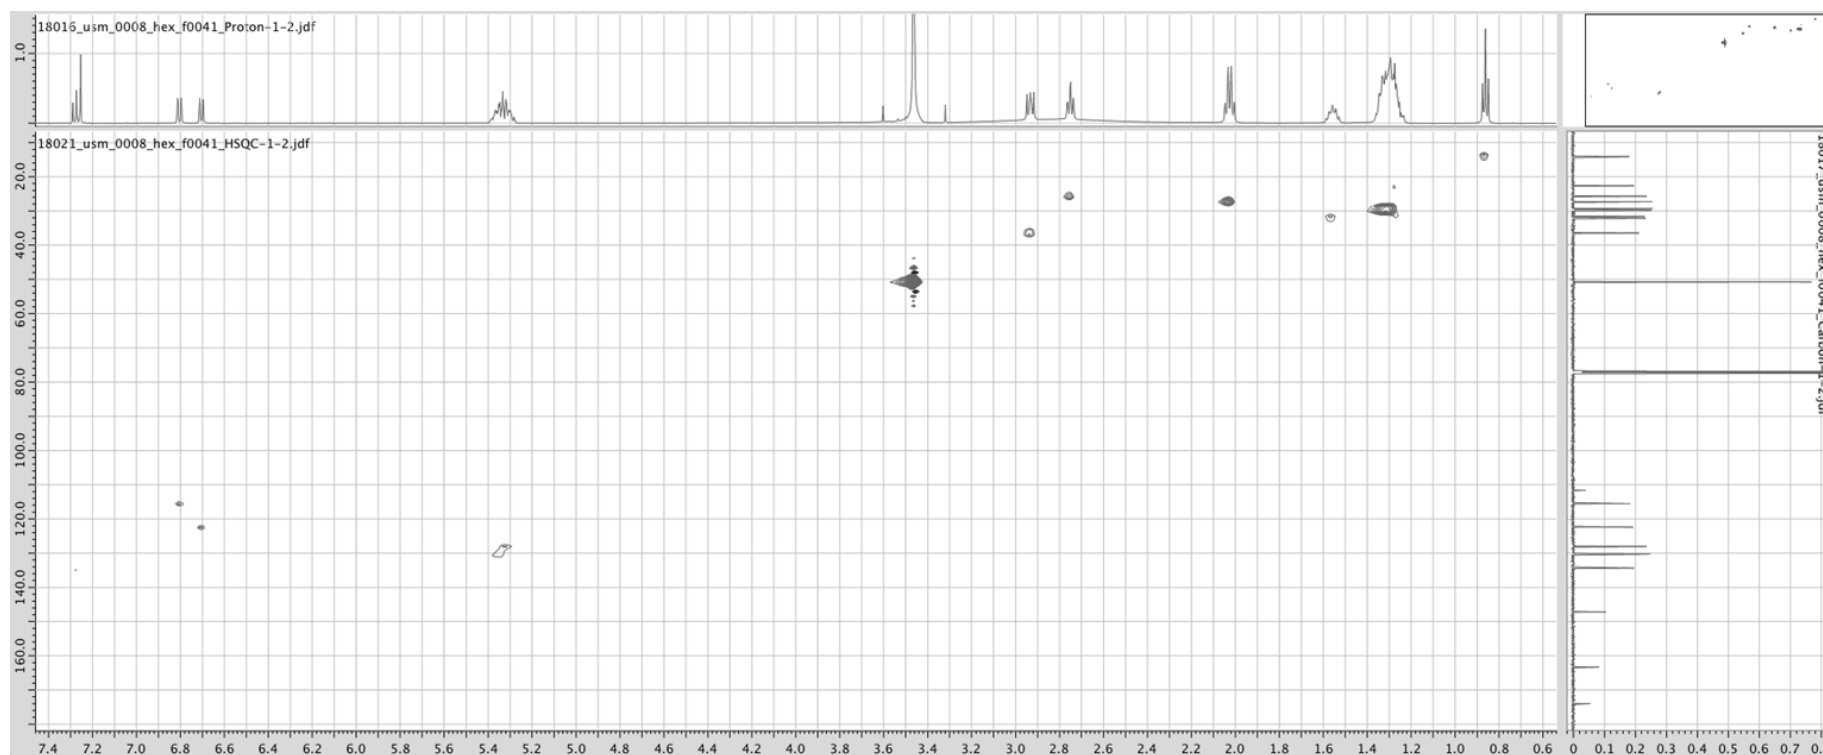

**Figure S22.** HSQC spectrum of 5.

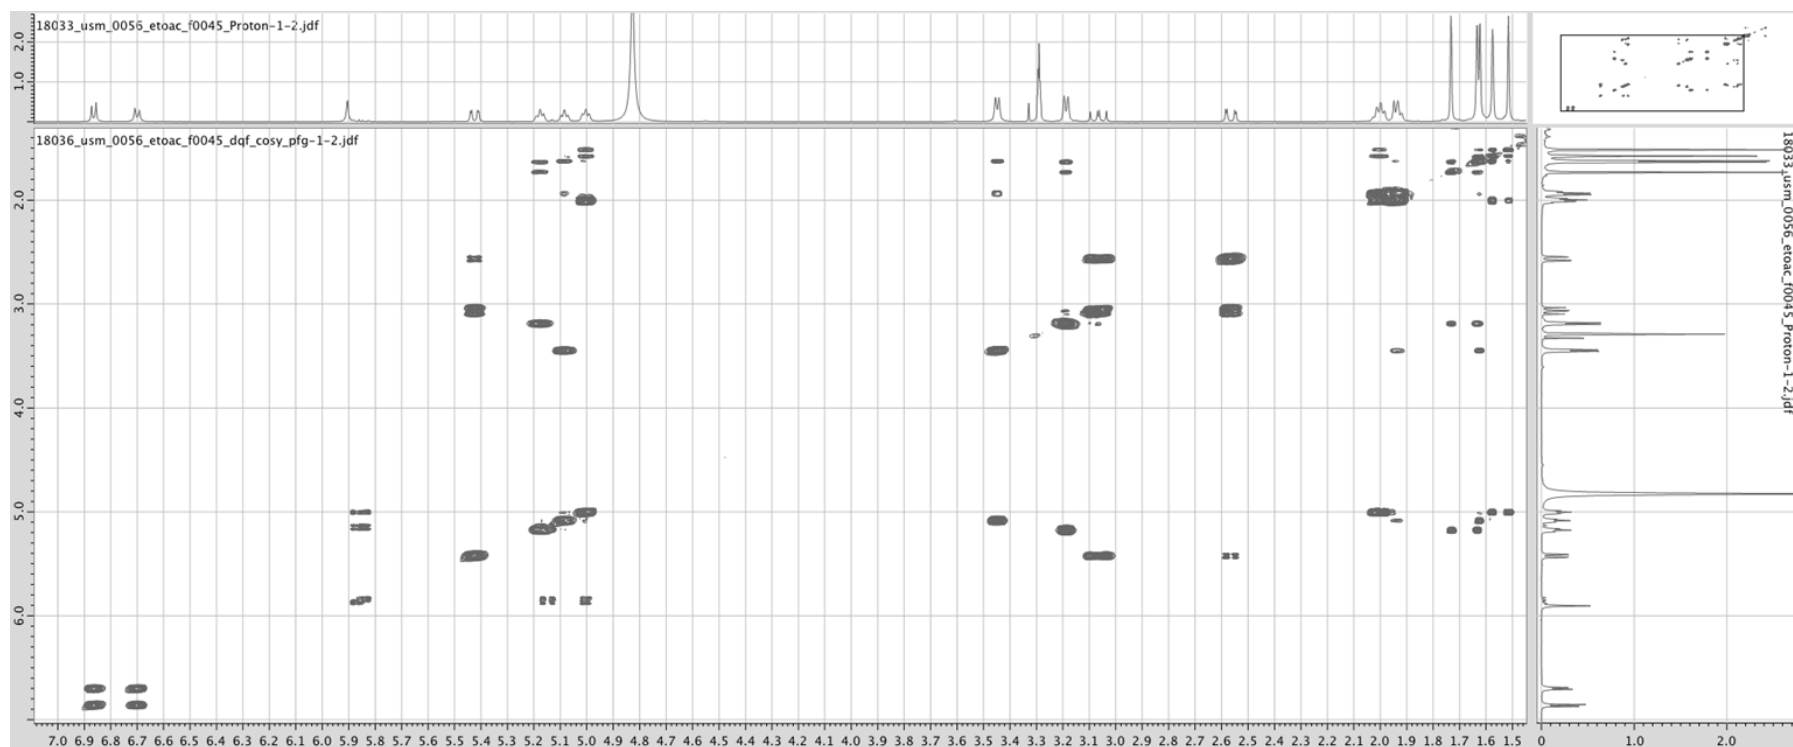

**Figure S23.** DQF-COSY spectrum of **1**.

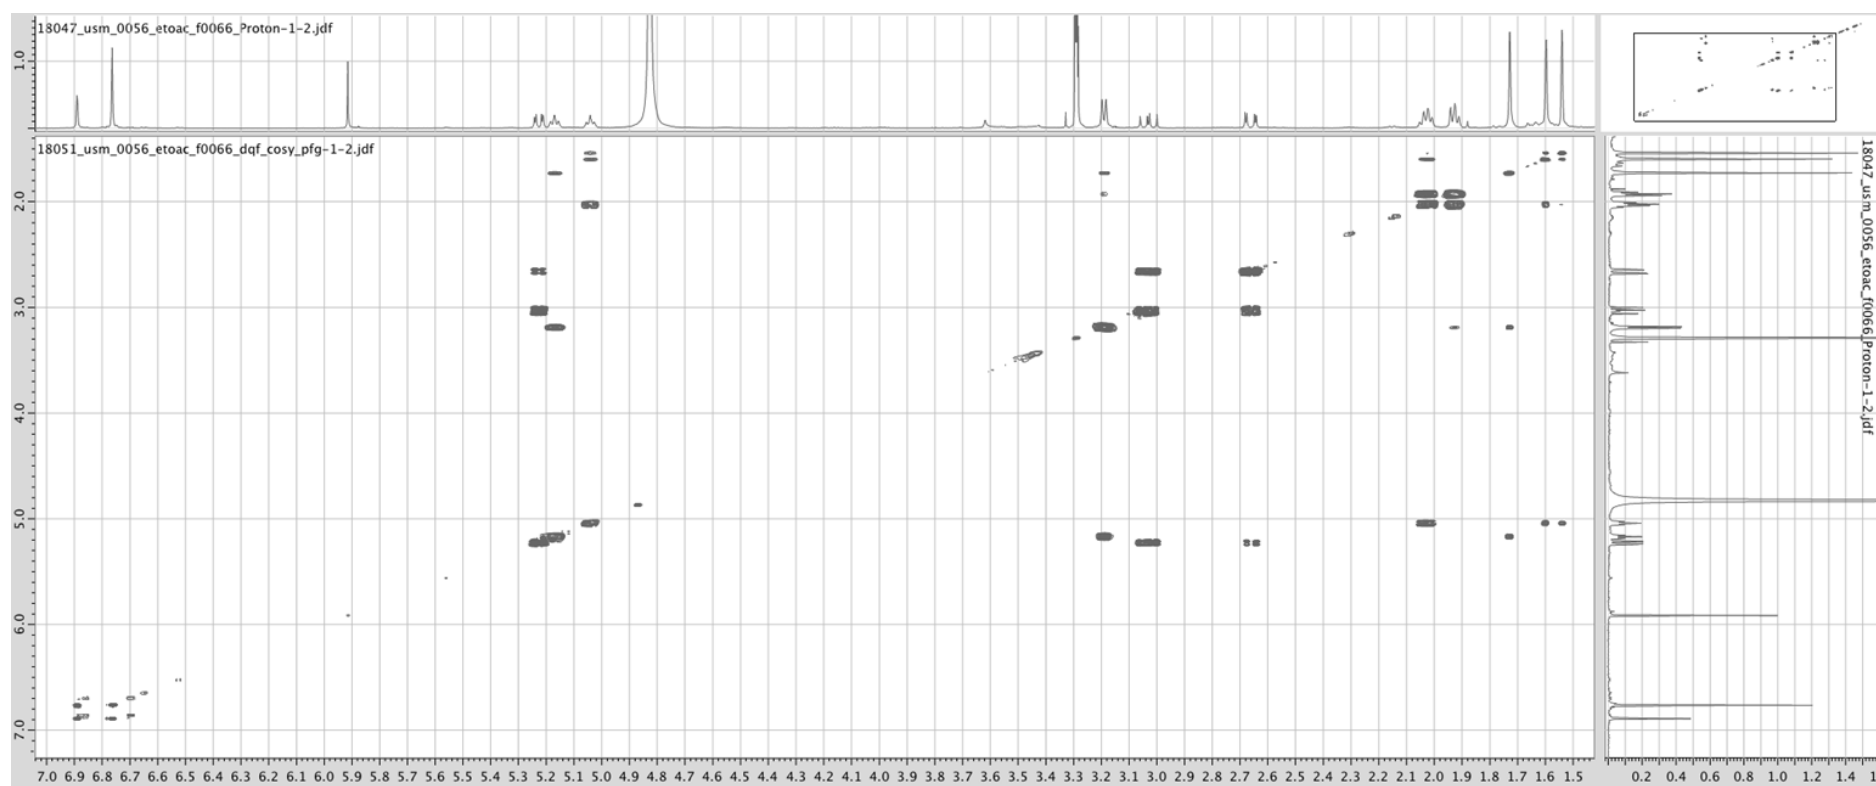

Figure S24. DQF-COSY spectrum of **3**.

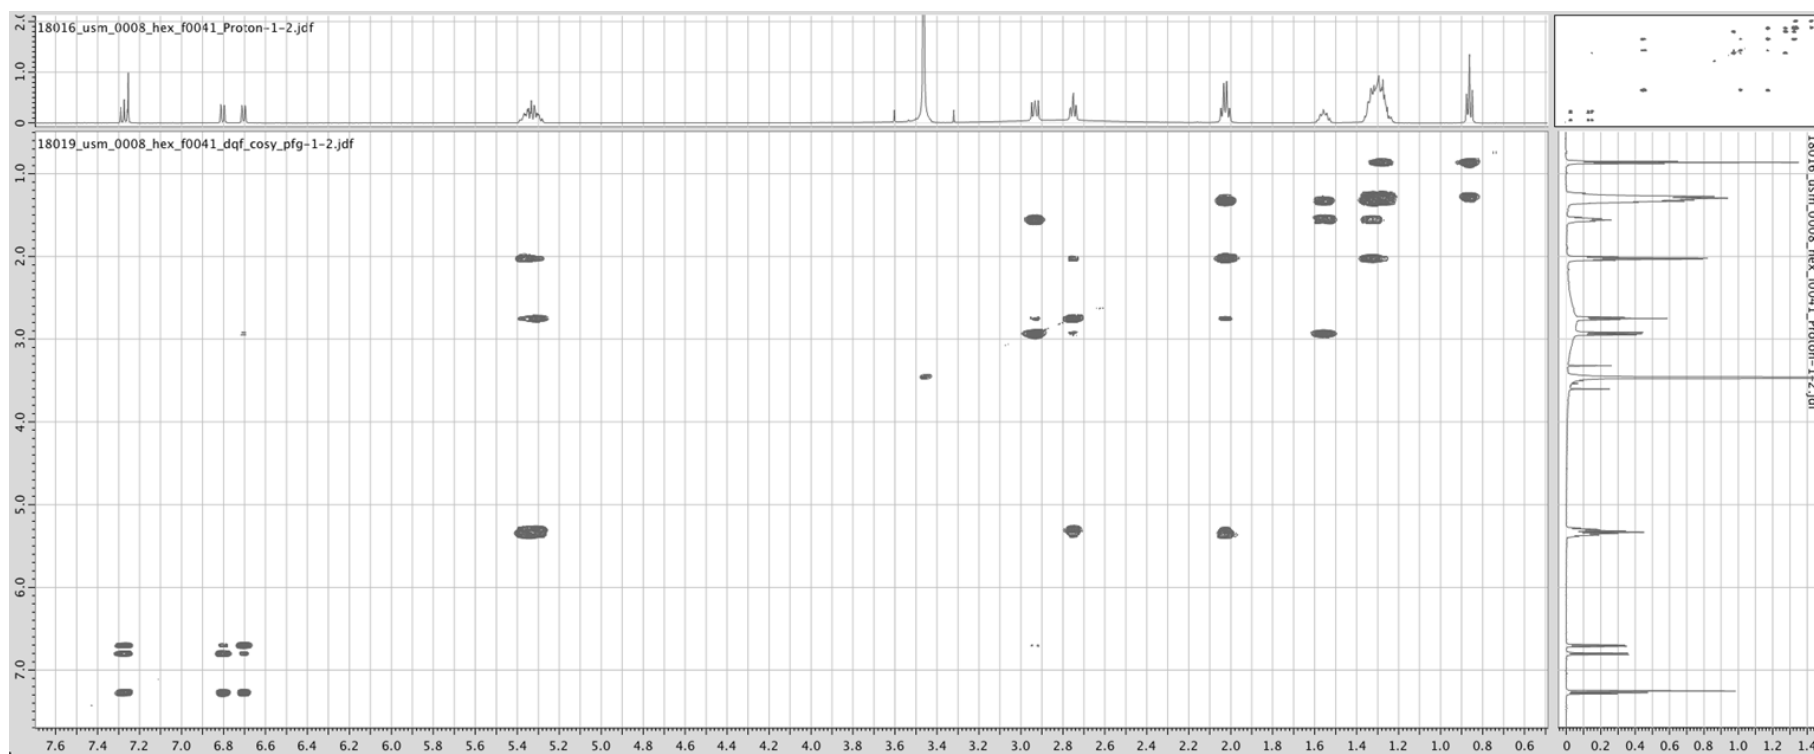

Figure S25. DQF-COSY spectrum of 5.

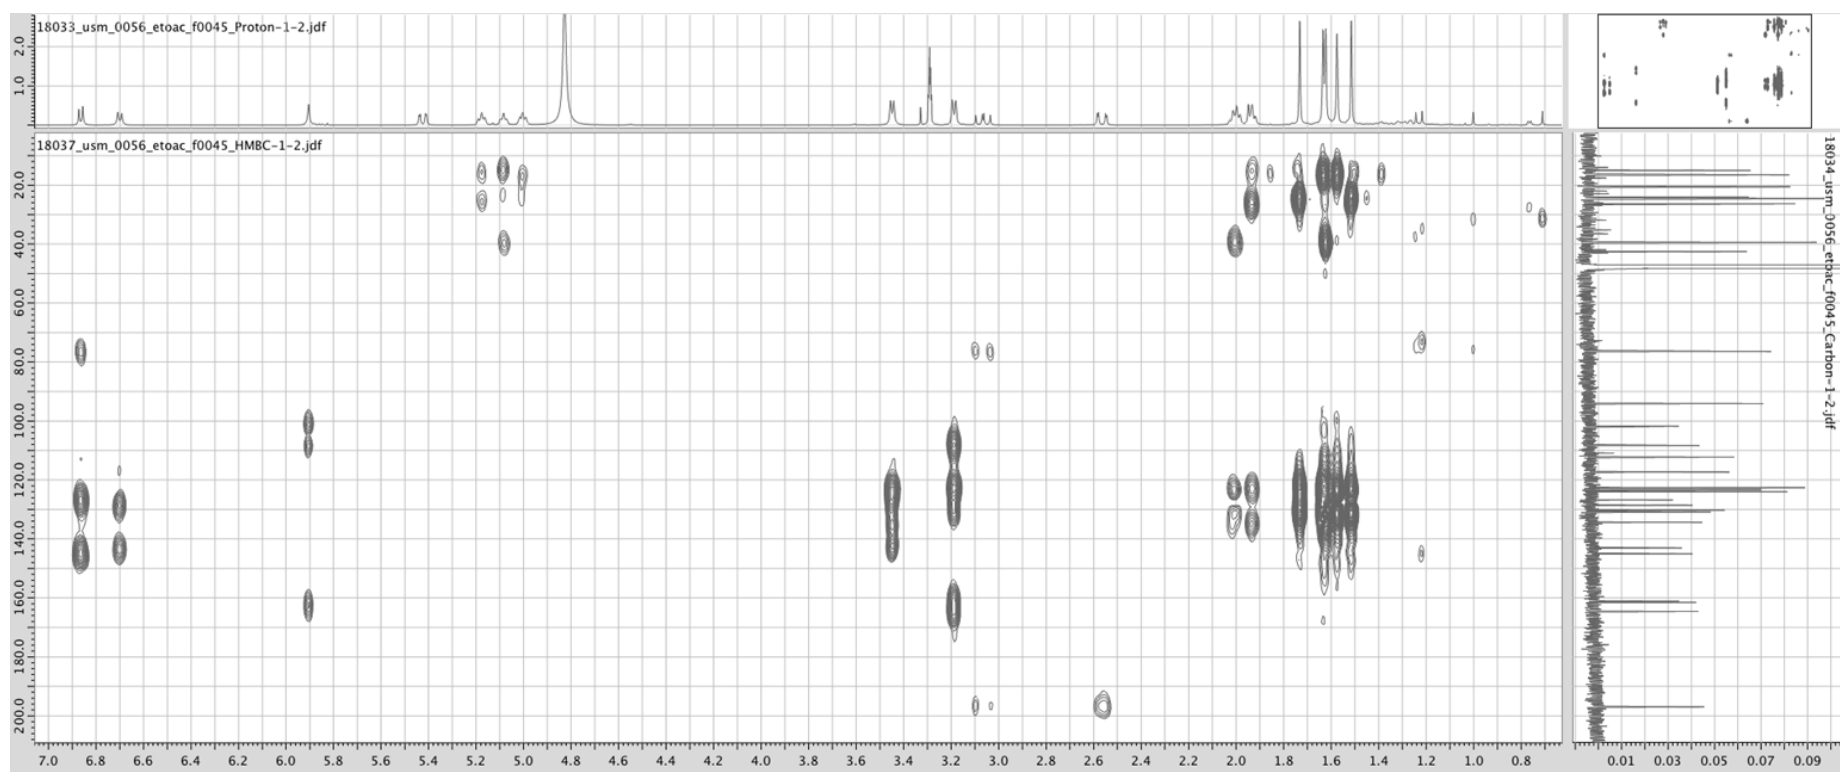

Figure S26. HMBC spectrum of **1**.

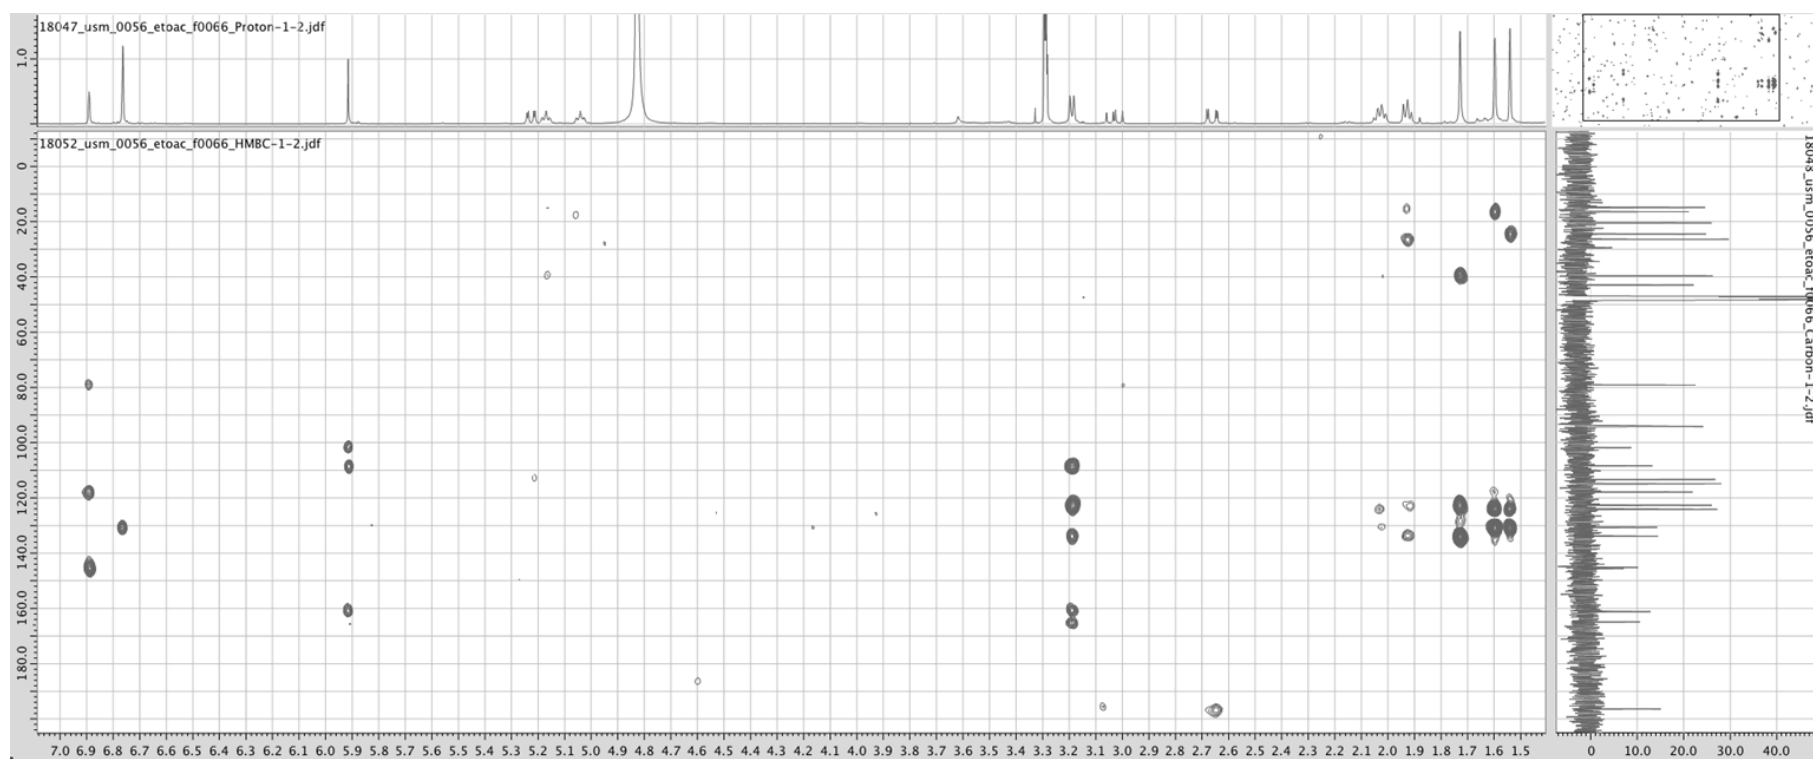

Figure S27. HMBC spectrum of 3.

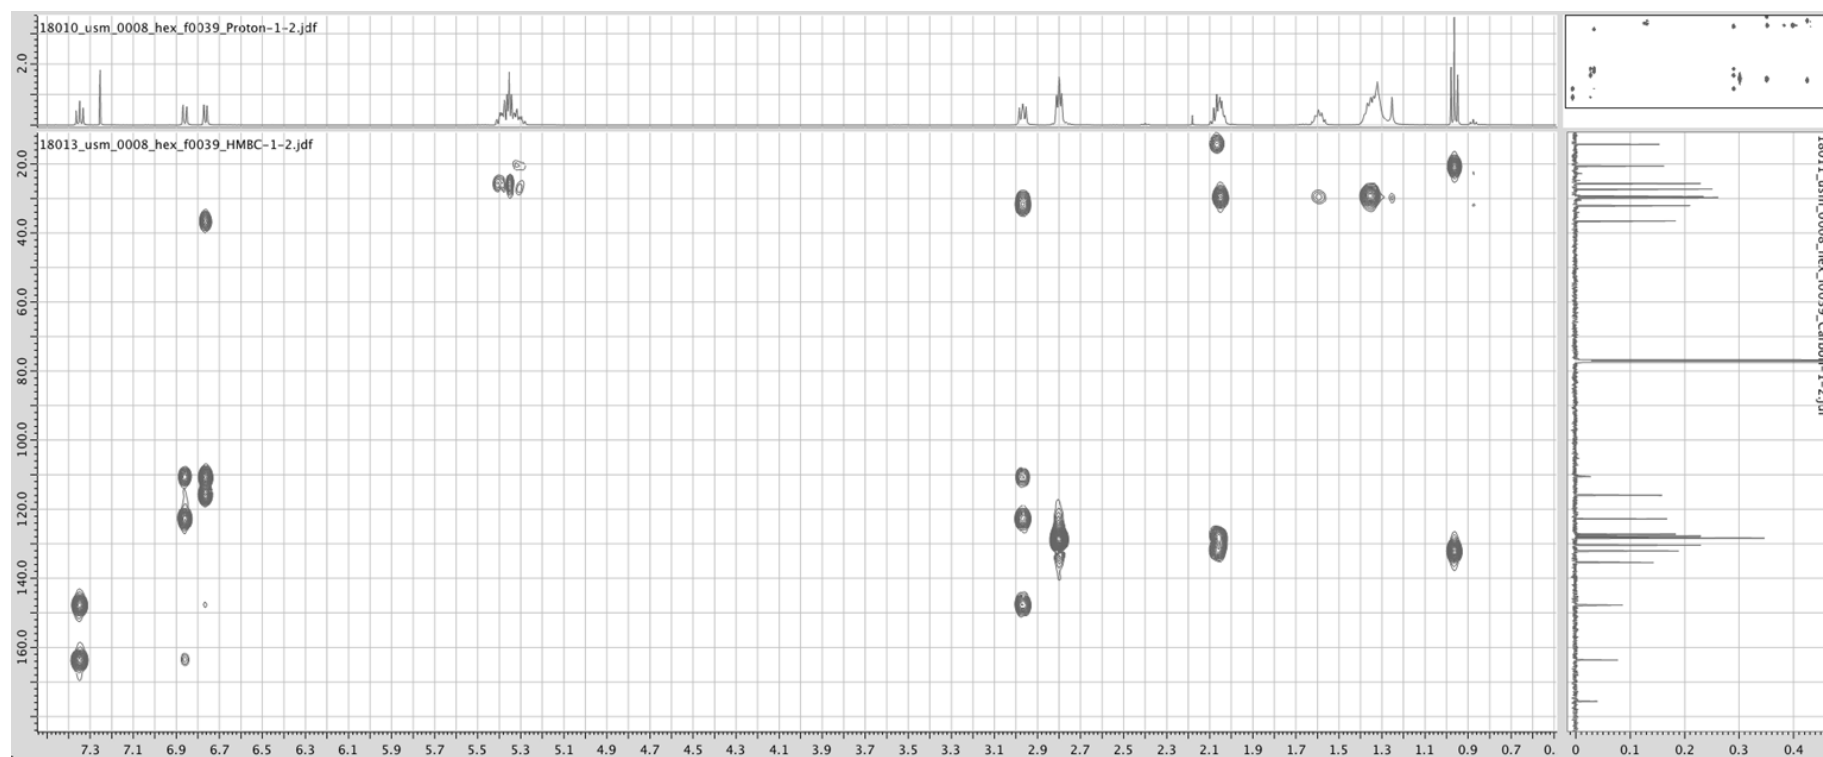

Figure S28. HMBC spectrum of **4**.

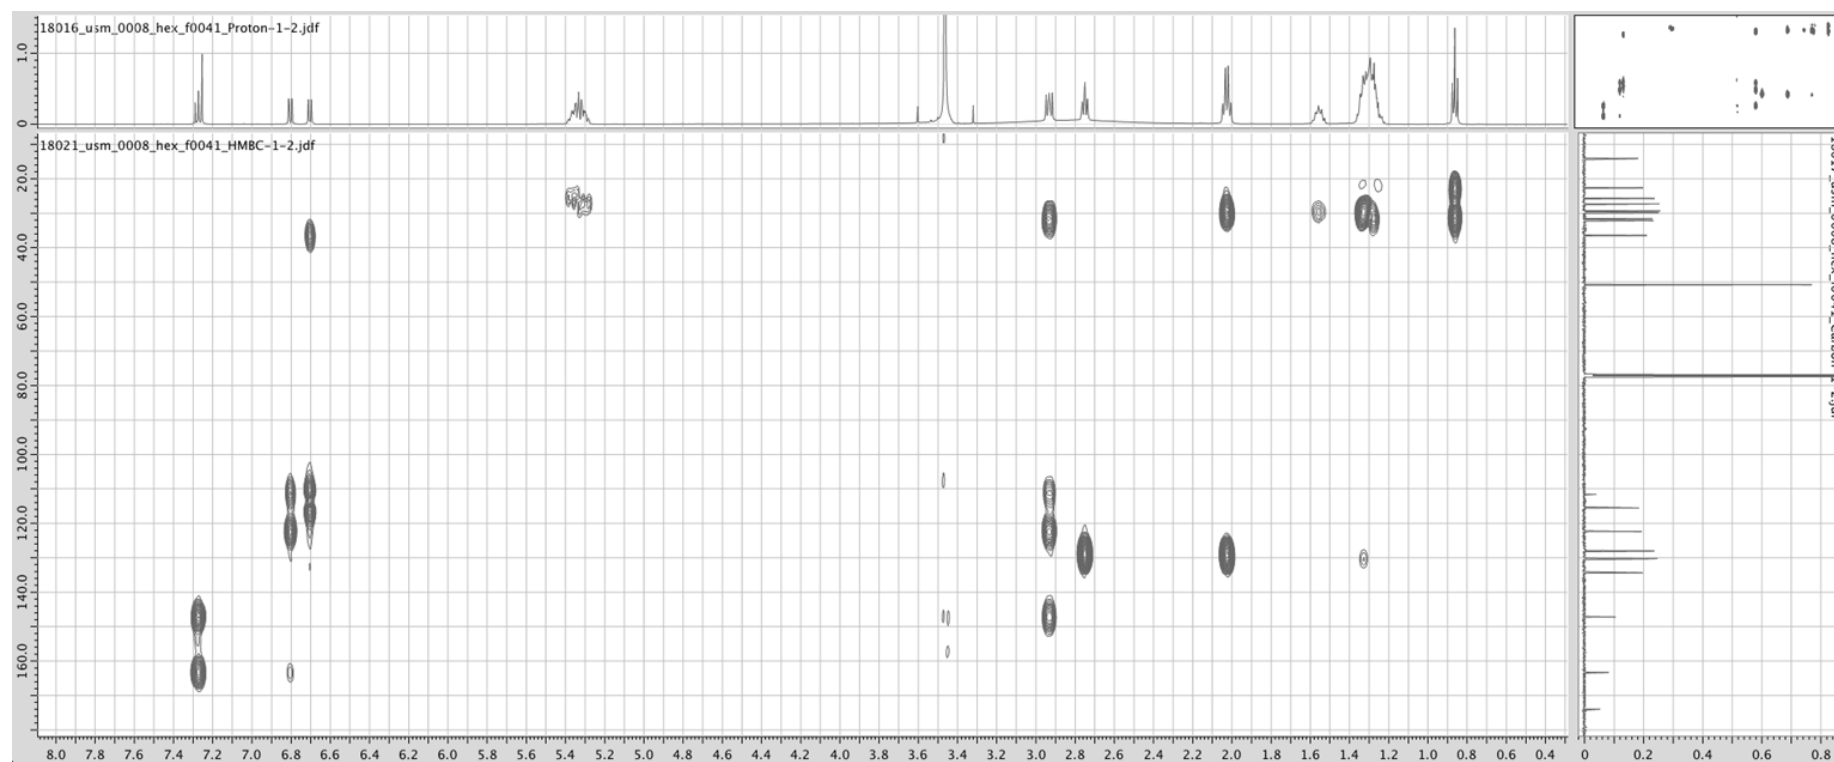

**Figure S29.** HMBC spectrum of **5**.

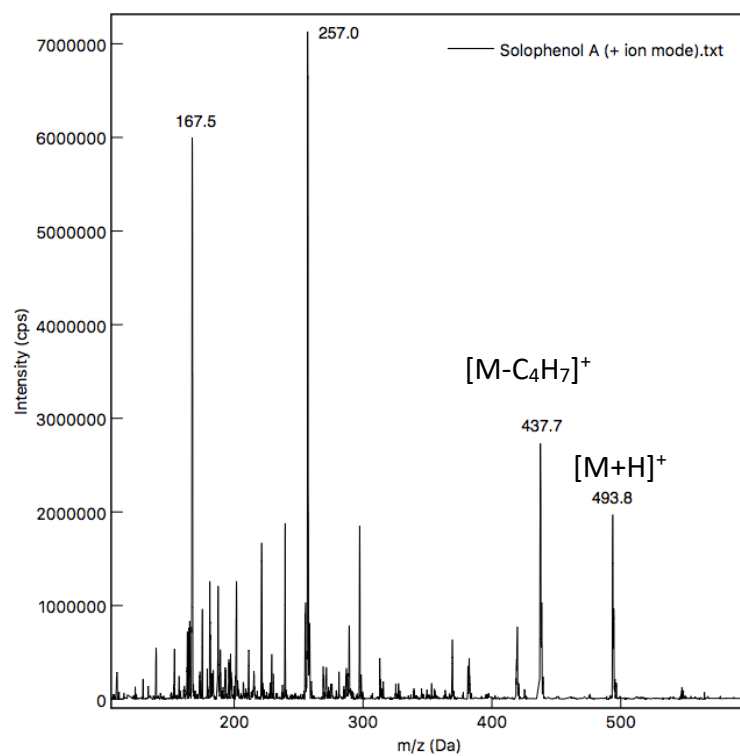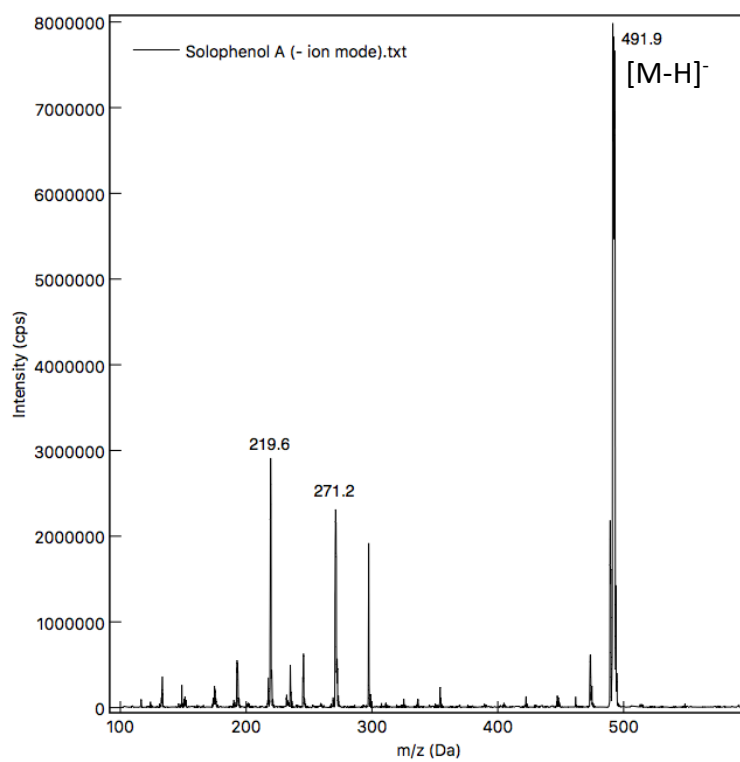

**Figure S30.** ESI-MS spectrum of **1** by UPLC-MS analysis.

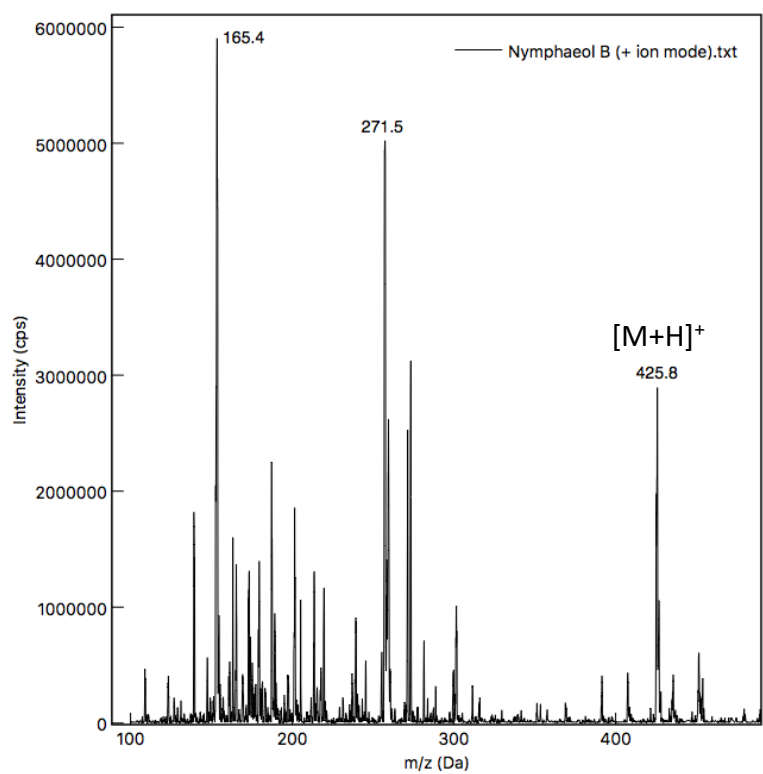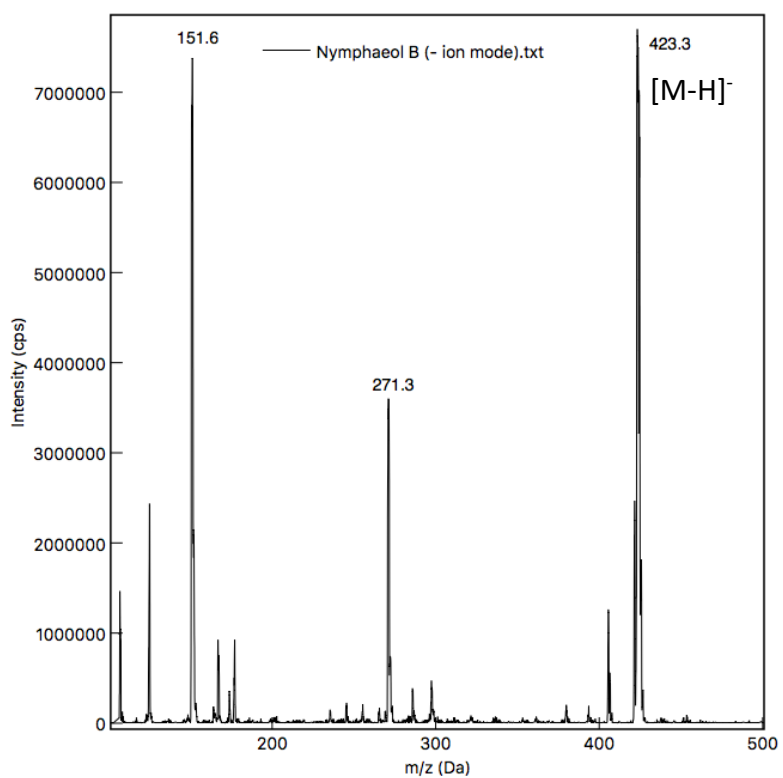

**Figure S31.** ESI-MS spectrum of **2** by UPLC-MS analysis.

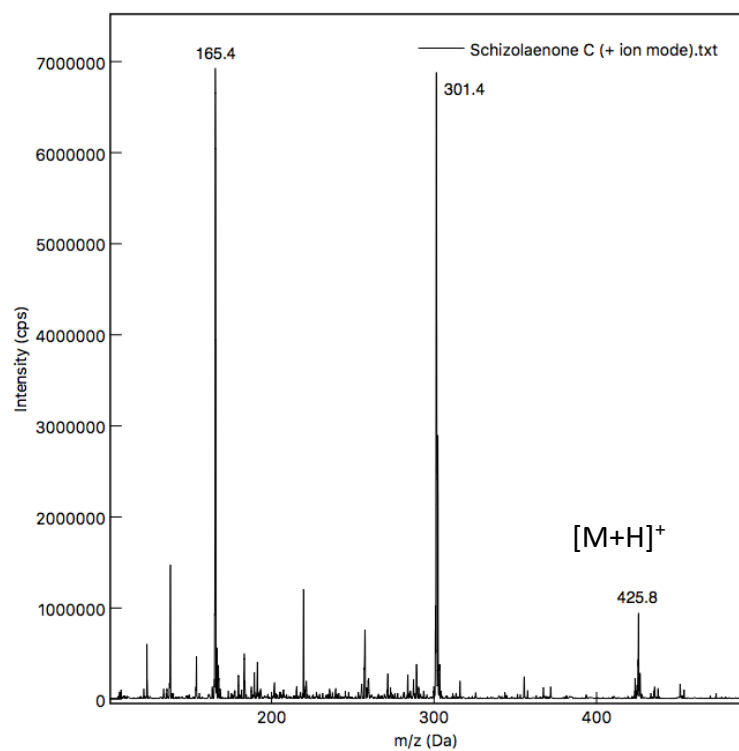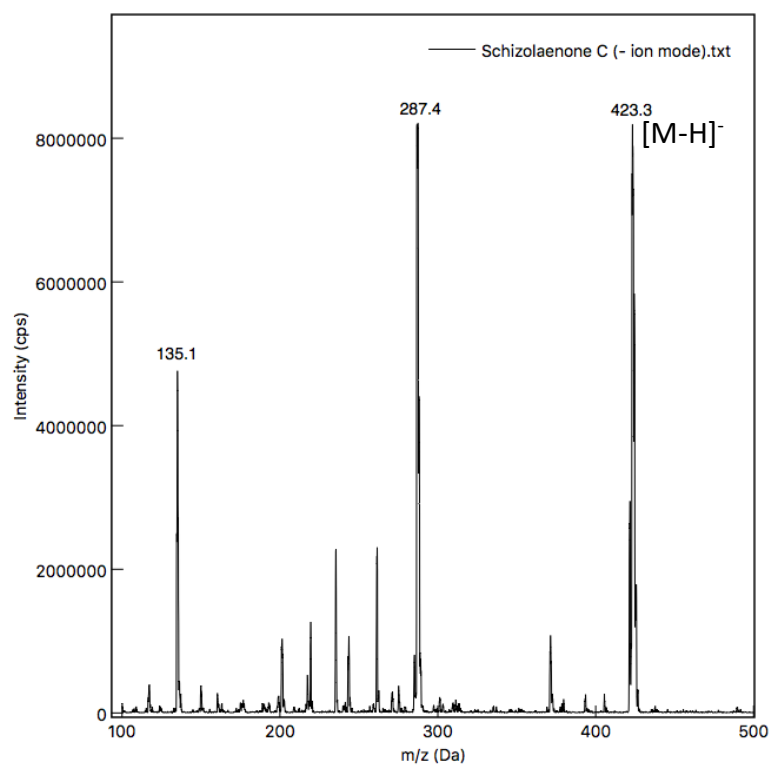

**Figure S32.** ESI-MS spectrum of **3** by UPLC-MS analysis.

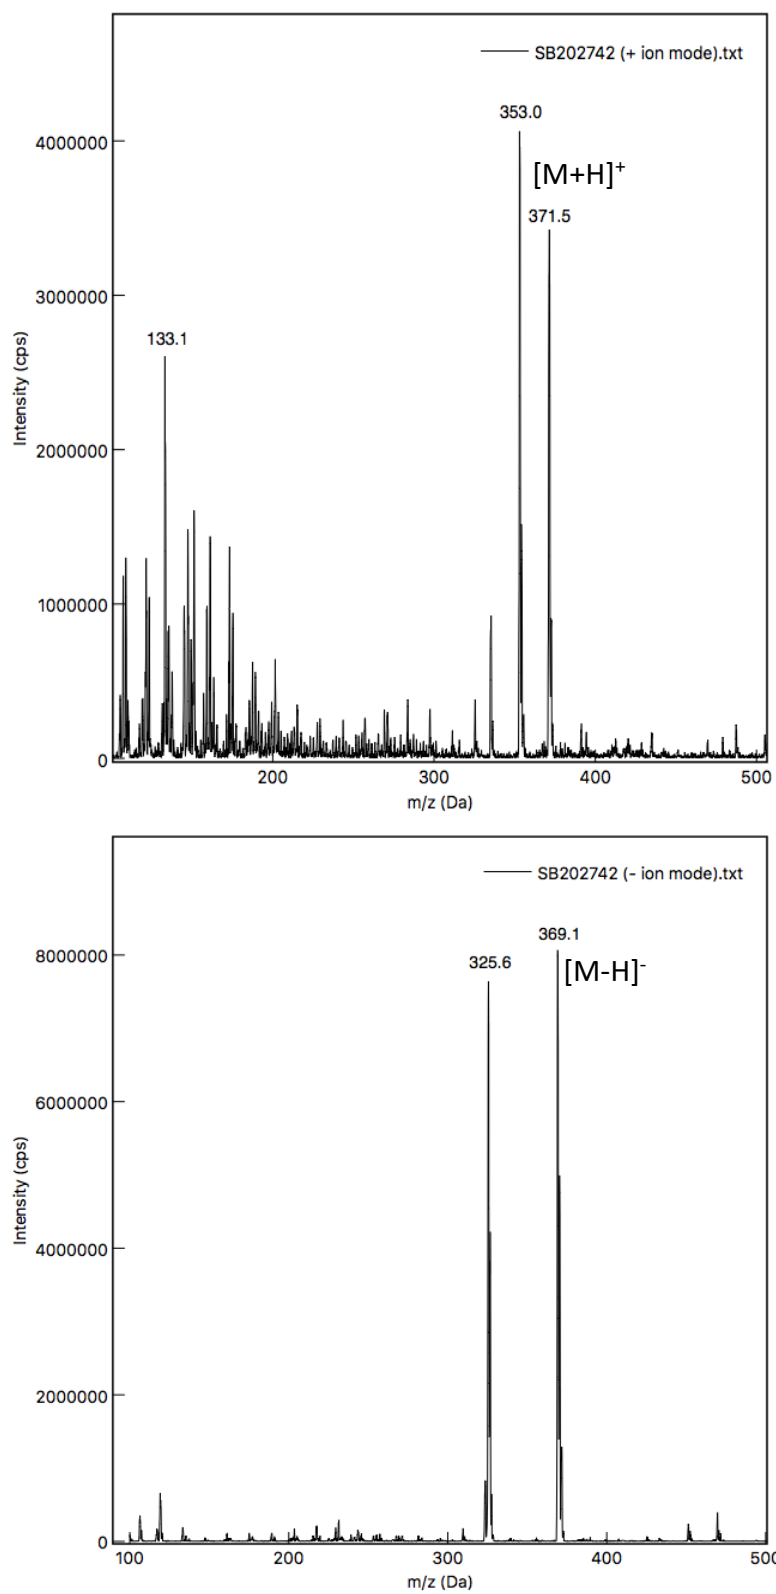

**Figure S33.** ESI-MS spectrum of compound **4** by UPLC-MS analysis.

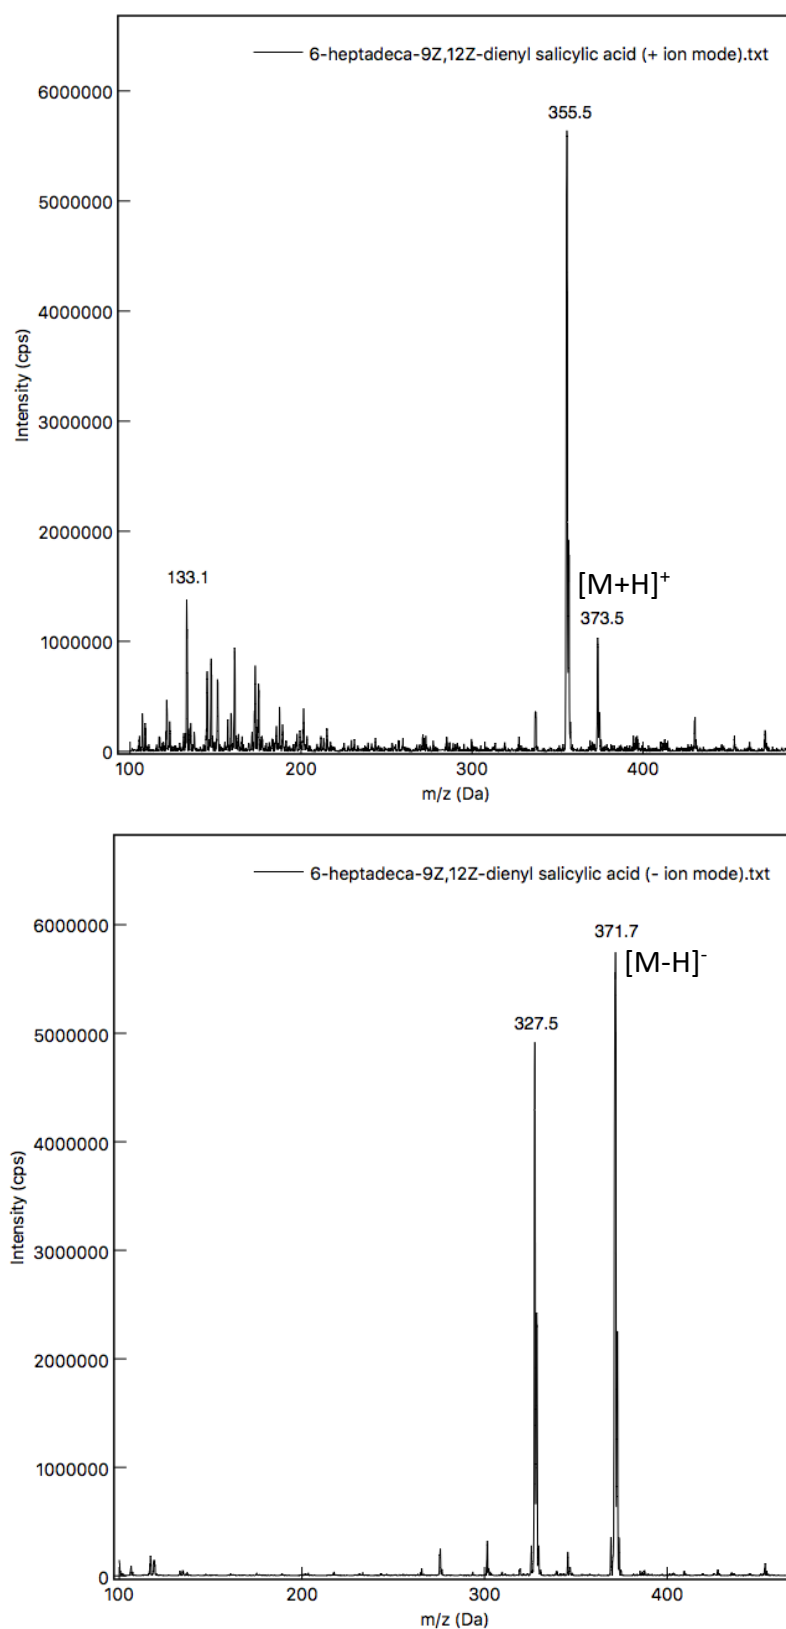

**Figure S34.** ESI-MS spectrum of **5** by UPLC-MS analysis.

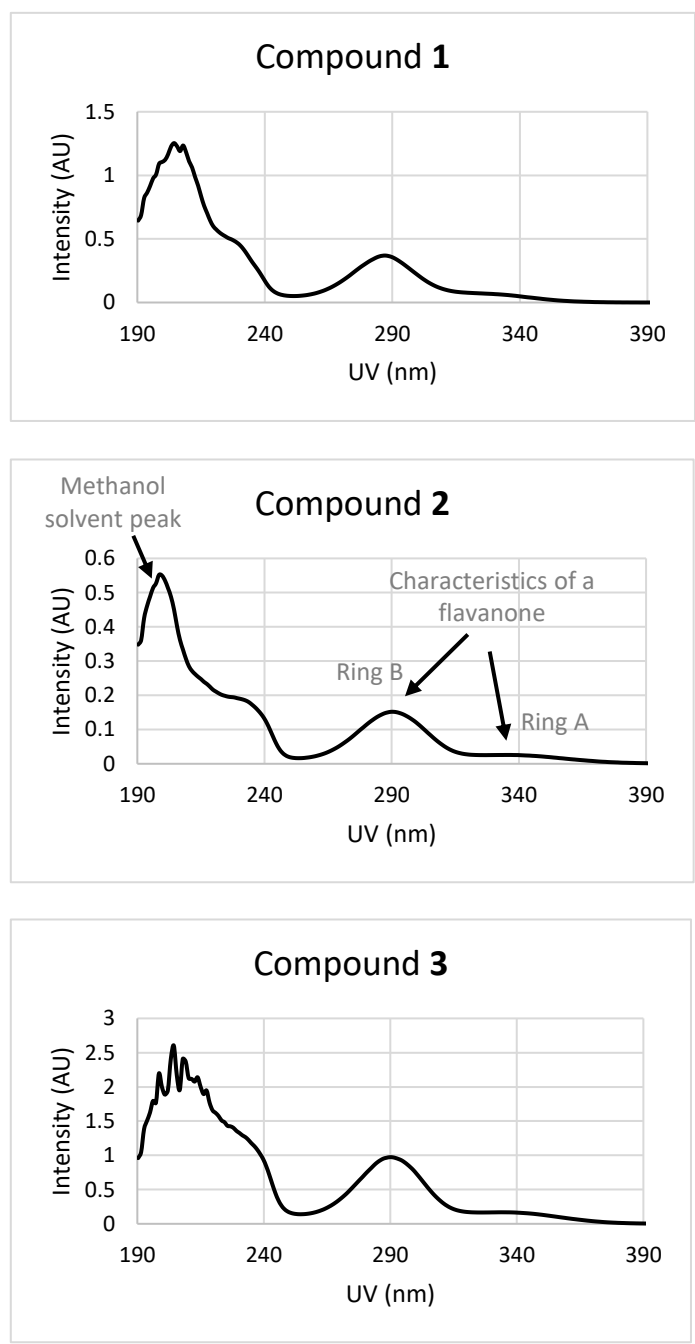

**Figure S35.** UV spectra of **1**, **2**, and **3** by UPLC-MS analysis.

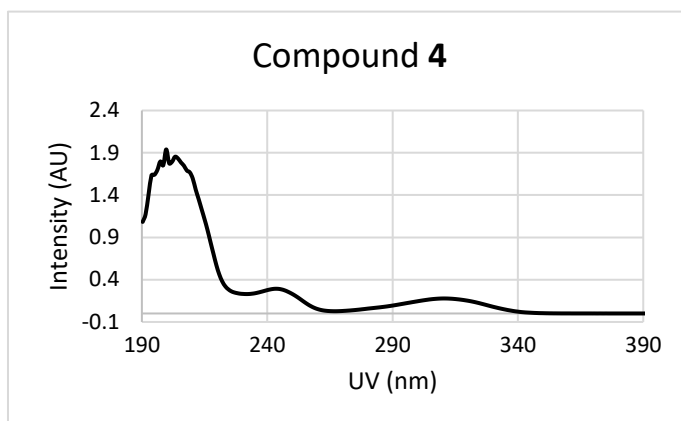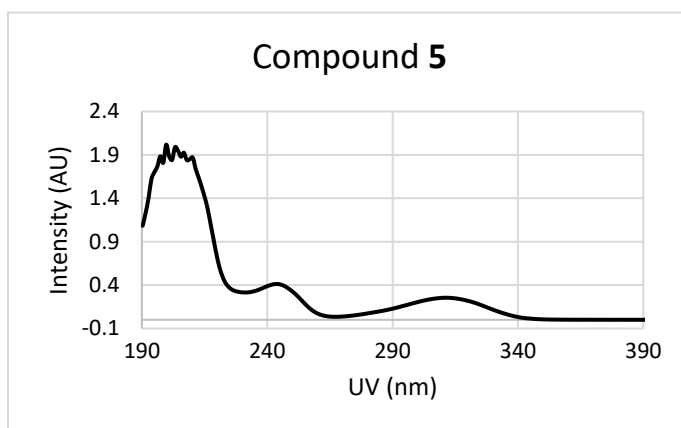

**Figure S36.** UV spectra of **4** and **5** by UPLC-MS analysis.

**Table S1.** Physicochemical properties of **1 – 5**.

| <i>Compound</i>                                         | <b>1</b>                                                        | <b>2</b>                                                        | <b>3</b>                                                        | <b>4</b>                                                         | <b>5</b>                                                         |
|---------------------------------------------------------|-----------------------------------------------------------------|-----------------------------------------------------------------|-----------------------------------------------------------------|------------------------------------------------------------------|------------------------------------------------------------------|
| Appearance                                              | Yellow oil                                                      |                                                                 |                                                                 |                                                                  |                                                                  |
| Molecular formula                                       | C <sub>56</sub> H <sub>97</sub> N <sub>11</sub> O <sub>12</sub> | C <sub>57</sub> H <sub>99</sub> N <sub>11</sub> O <sub>12</sub> | C <sub>57</sub> H <sub>99</sub> N <sub>11</sub> O <sub>12</sub> | C <sub>58</sub> H <sub>101</sub> N <sub>11</sub> O <sub>12</sub> | C <sub>59</sub> H <sub>103</sub> N <sub>11</sub> O <sub>12</sub> |
| UV (MeOH) $\lambda_{\text{max}}$ (log $\epsilon$ ) (nm) | 233, 289, 334                                                   | 233, 287, 334                                                   | 233, 290, 334                                                   | 200, 243, 311                                                    | 200, 243, 311                                                    |
| ESI-MS ( <i>m/z</i> )                                   | 491.9 [M–H] <sup>–</sup>                                        | 423.3 [M–H] <sup>–</sup>                                        | 423.3 [M–H] <sup>–</sup>                                        | 369.1 [M–H] <sup>–</sup>                                         | 371.7 [M–H] <sup>–</sup>                                         |
|                                                         | C <sub>30</sub> H <sub>35</sub> O <sub>6</sub>                  | C <sub>25</sub> H <sub>27</sub> O <sub>6</sub>                  | C <sub>25</sub> H <sub>27</sub> O <sub>6</sub>                  | C <sub>24</sub> H <sub>33</sub> O <sub>3</sub>                   | C <sub>24</sub> H <sub>35</sub> O <sub>3</sub>                   |

**Table S2.** Comparison of NMR chemical shifts of **1** with reported compounds, solophenol A [16] and nymphaeol C [4].

| <sup>13</sup> C | Compound 1<br>in CD <sub>3</sub> OD |                            | Solophenol A<br>in acetone- <i>d</i> <sub>6</sub> |                            | Nymphaeol C<br>in acetone- <i>d</i> <sub>6</sub> |                            |
|-----------------|-------------------------------------|----------------------------|---------------------------------------------------|----------------------------|--------------------------------------------------|----------------------------|
|                 | δ <sup>13</sup> C                   | δ <sup>1</sup> H (J in Hz) | δ <sup>13</sup> C                                 | δ <sup>1</sup> H (J in Hz) | δ <sup>13</sup> C                                | δ <sup>1</sup> H (J in Hz) |
| 2               | 77.9                                | 5.44, dd (3,13.5)          | 77.2                                              | 5.58, dd (2.7,13.3)        | 76.9                                             | 5.44, dd (3.2,12.4)        |
|                 |                                     | 2.59, dd (3,17)            |                                                   | 2.66, dd (2.7,17.3)        |                                                  | Eq 2.69, dd (3.2,17.2)     |
| 3               | 44.0                                | 3.09, dd<br>(13.5,17)      | 43.3                                              | 3.15, dd (13.3,17.3)       | 43.3                                             | Ax 3.09, dd<br>(12.4,17.2) |
| 4               | 198.4                               |                            | 198.0                                             |                            | 197                                              |                            |
| 5               | 163.0                               |                            | 163.0                                             |                            | 161.8                                            |                            |
| 6               | 95.6                                | 5.92, s                    | 96.3                                              | 6.05, s                    | 108.7                                            |                            |
| 7               | 166.1                               |                            | 164.9                                             |                            | 164.4                                            |                            |
| 8               | 109.8                               |                            | 108.3                                             |                            | 95                                               | 5.92, s                    |
| 9               | 162.6                               |                            | 161.5                                             |                            | 161.8                                            |                            |
| 10              | 103.2                               |                            | 103.2                                             |                            | 102.7                                            |                            |
| 1'              | 130.0                               |                            | 130.1                                             |                            | 129.5                                            |                            |
| 2'              | 128.3                               |                            | 127.6                                             |                            | 127.1                                            |                            |
| 3'              | 144.5                               |                            | 144.1                                             |                            | 143.6                                            |                            |
| 4'              | 146.5                               |                            | 145.6                                             |                            | 145.1                                            |                            |
| 5'              | 113.7                               | 6.72, d (8)                | 113.5                                             | 6.84, d (8.3)              | 113.2                                            | 6.91, d (8)                |
| 6'              | 118.7                               | 6.88, d, (8)               | 118.6                                             | 7.01, d (8.3)              | 118.1                                            | 6.74, d (8)                |
| 1''             | 25.5                                | 3.47, d                    | 25.2                                              | 3.58, m                    | 25.1                                             | 3.36                       |
| 2''             | 124.8                               | 5.11, t (6,6)              | 123.8                                             | 5.16, m                    | 123.7                                            | 5.11                       |
| 3''             | 135.8                               |                            | 135.4                                             |                            | 135                                              |                            |
| 4''             | 16.5                                | 1.65, d (5)                | 16.3                                              | 1.69, s                    | 16.3                                             | 1.74                       |
| 5''             | 40.9                                | 1.95, t (7,7)              | 40.4                                              | 1.97, m                    | 40.2                                             | 2.02                       |
| 6''             | 27.8                                | 2.03, q (14,15)            | 27.4                                              | 2.05, m                    | 27.2                                             | 2.02                       |
| 7''             | 125.5                               | 5.02, t (6,7)              | 124.3                                             | 5.16, m                    | 124.6                                            | 5.11                       |
| 8''             | 132.4                               |                            | 131.8                                             |                            | 131.3                                            |                            |
| 9''             | 26.0                                | 1.60, s                    | 25.8                                              | 1.61, s                    | 17.8                                             | 1.56                       |
| 10''            | 17.9                                | 1.54, s                    | 17.7                                              | 1.56, s                    | 25.7                                             | 1.64                       |
| 1'''            | 22.0                                | 3.21, d                    | 22.3                                              | 3.22, m                    | 21.5                                             | 3.36,                      |
| 2'''            | 124.1                               | 5.20, t (6,7)              | 125.0                                             | 5.06, m                    | 123.3                                            | 5.11                       |
| 3'''            | 131.7                               |                            | 131.2                                             |                            | 130.7                                            |                            |
| 4'''            | 26.1                                | 1.65, d (5)                | 25.9                                              | 1.61, s                    | 17.8                                             | 1.8                        |
| 5'''            | 17.998                              | 1.75, s                    | 17.8                                              | 1.58, s                    | 25.7                                             | 1.74                       |

s: singlet; d: doublet; dd: doublet of doublet; m: multiplet; Eq: equatorial; Ax: axial

**Table S3.** Comparison of NMR chemical shifts of **2** with reported compound, nymphaeol B [4].

| <sup>13</sup> C | Compound 2<br>in CD <sub>3</sub> OD |                                     | Nymphaeol-B<br>in acetone- <i>d</i> <sub>6</sub> |                                                  |
|-----------------|-------------------------------------|-------------------------------------|--------------------------------------------------|--------------------------------------------------|
|                 | δ <sup>13</sup> C                   | δ <sup>1</sup> H (J in Hz)          | δ <sup>13</sup> C                                | δ <sup>1</sup> H (J in Hz)                       |
| 2               | 77.5                                | 5.47, dd (3,13)                     | 77                                               | 5.61, dd (3.2,12.6)                              |
| 3               | 43.8                                | 2.60, dd (3,18)<br>3.11, dd (13,17) | 43.1                                             | Eq 2.65 dd (3.2,17.2)<br>Ax 3.17, dd (12.6,17.2) |
| 4               | 198.2                               |                                     | 197                                              |                                                  |
| 5               | 165.3                               |                                     | 164.8                                            |                                                  |
| 6               | 97.4                                | 5.87, s                             | 96.6                                             | 5.97, s                                          |
| 7               | 169.2                               |                                     | 167                                              |                                                  |
| 8               | 96.5                                | 5.87, s                             | 95.6                                             | 5.97, s                                          |
| 9               | 165.7                               |                                     | 164.2                                            |                                                  |
| 10              | 103.2                               |                                     | 102.8                                            |                                                  |
| 1'              | 129.9                               |                                     | 129.4                                            |                                                  |
| 2'              | 128.4                               |                                     | 127.3                                            |                                                  |
| 3'              | 144.6                               |                                     | 143.7                                            |                                                  |
| 4'              | 146.6                               |                                     | 145.2                                            |                                                  |
| 5'              | 113.7                               | 6.72, d (8)                         | 113.2                                            | 6.98, d (8)                                      |
| 6'              | 118.8                               | 6.89, d, (8)                        | 118.2                                            | 6.81, d (8)                                      |
| 1''             | 25.5                                | 4.48, d (7)                         | 25.1                                             | 3.54                                             |
| 2''             | 124.8                               | 5.11, t (5,7)                       | 123.8                                            | 5.10                                             |
| 3''             | 135.8                               |                                     | 135.2                                            |                                                  |
| 4''             | 16.5                                | 1.65, s                             | 16.3                                             | 1.7                                              |
| 5''             | 40.9                                | 1.96, t (8,7)                       | 40.3                                             | 2.00                                             |
| 6''             | 27.8                                | 2.03, q (7,14)                      | 27.2                                             | 2.00                                             |
| 7''             | 125.5                               | 5.03, t (7,7)                       | 124.7                                            | 5.10                                             |
| 8''             | 132.4                               |                                     | 131.4                                            |                                                  |
| 9''             | 17.9                                | 1.55, s                             | 17.6                                             | 1.56                                             |
| 10''            | 26.0                                | 1.61, s                             | 25.7                                             | 1.62                                             |

s: singlet; d: doublet; dd: doublet of doublet; m: multiplet; t: triplet; q: quartet; Eq: equatorial; Ax: axial

**Table S4.** Comparison of NMR chemical shifts of **3** with reported compound, schizolaenone C [17].

| <sup>13</sup> C | Compound 3<br>in CD <sub>3</sub> OD |                                       | Schizolaenone C<br>in CD <sub>3</sub> OD |                                                     |
|-----------------|-------------------------------------|---------------------------------------|------------------------------------------|-----------------------------------------------------|
|                 | δ <sup>13</sup> C                   | δ <sup>1</sup> H (J in Hertz)         | δ <sup>13</sup> C                        | δ <sup>1</sup> H (J in Hertz)                       |
| 2               | 80.6                                | 5.25, dd (3,12.5)                     | 80.4                                     | 5.24, dd (3.2, 12.8)                                |
| 3               | 44.4                                | 2.68, dd (3,17)<br>3.05, dd (12.5,17) | 44.2                                     | Eq 2.68, dd (3.2, 16.8)<br>Ax 3.05, dd (12.8, 16.8) |
| 4               | 197.9                               |                                       | 197.8                                    |                                                     |
| 5               | 162.6                               |                                       | 162.4                                    |                                                     |
| 6               | 109.9                               |                                       | 109.7                                    |                                                     |
| 7               | 166.4                               |                                       | 165.9                                    |                                                     |
| 8               | 95.6                                | 5.94, s                               | 95.4                                     | 5.94, s                                             |
| 9               | 162.7                               |                                       | 162.5                                    |                                                     |
| 10              | 103.3                               |                                       | 103.2                                    |                                                     |
| 1'              | 132.2                               |                                       | 131.9                                    |                                                     |
| 2'              | 119.4                               | 6.79, s                               | 119.2                                    | 6.91, s                                             |
| 3'              | 147.0                               |                                       | 146.8                                    |                                                     |
| 4'              | 116.4                               | 6.79, s                               | 116.2                                    | 6.78, s                                             |
| 5'              | 146.7                               |                                       | 146.5                                    |                                                     |
| 6'              | 114.8                               | 6.91, s                               | 114.7                                    | 6.78, s                                             |
| 1''             | 21.9                                | 3.21, d (8)                           | 21.8                                     | 3.21, d (7.2)                                       |
| 2''             | 124.2                               | 5.19, t (6,7)                         | 123.9                                    | 5.19, m                                             |
| 3''             | 135.4                               |                                       | 135.2                                    |                                                     |
| 4''             | 16.3                                | 1.75, s                               | 16.2                                     | 1.74, s                                             |
| 5''             | 41.1                                | 1.95, t (8,7)                         | 40.9                                     | 2.04, m                                             |
| 6''             | 27.9                                | 2.05, q (6,8)                         | 27.7                                     | 1.94, m                                             |
| 7''             | 125.6                               | 5.06, t (7,7)                         | 125.4                                    | 5.06, m                                             |
| 8''             | 132.1                               |                                       | 132                                      |                                                     |
| 9''             | 26.0                                | 1.62, s                               | 25.8                                     | 1.62, s                                             |
| 10''            | 17.8                                | 1.56, s                               | 17.7                                     | 1.56, s                                             |

s: singlet; d: doublet; dd: doublet of doublet; m: multiplet; t: triplet; q: quartet; Eq: equatorial; Ax: axial

**Table S5.** Comparison of NMR chemical shifts of **4** with reported compound, SB-202742 [18].

| Compound <b>4</b> in CDCl <sub>3</sub> |                   |                  |                              | SB-202742         |                  |                              |
|----------------------------------------|-------------------|------------------|------------------------------|-------------------|------------------|------------------------------|
| <sup>13</sup> C                        | δ <sup>13</sup> C | δ <sup>1</sup> H | Multiplicity<br>(J in Hertz) | δ <sup>13</sup> C | δ <sup>1</sup> H | Multiplicity<br>(J in Hertz) |
| <b>1</b>                               | 110.7             |                  |                              | 118.6             |                  |                              |
| <b>2</b>                               | 163.8             |                  |                              | 162.3             |                  |                              |
| <b>3</b>                               | 116.1             | 6.85             | d (7.5)                      | 115.2             | 6.65             | dd (7.9,1.0)                 |
| <b>4</b>                               | 135.6             | 7.34             | t (7.5)                      | 132.4             | 7.11             | dd (7.7,7.9)                 |
| <b>5</b>                               | 122.9             | 6.75             | d (7.5)                      | 122.5             | 6.61             | dd (7.7,1.0)                 |
| <b>6</b>                               | 147.9             |                  |                              | 147.5             |                  |                              |
| <b>7</b>                               | 175.8             |                  |                              | 176.5             |                  |                              |
| <b>1'</b>                              | 36.7              | 2.96             | t (8.0)                      | 36.4              | 3.02             | t (7.7)                      |
| <b>2'</b>                              | 32.2              | 1.58             | qu                           | 33.3              | 1.58             | br                           |
| <b>3'</b>                              | 29.5              |                  |                              | 30.1              |                  |                              |
| <b>4'</b>                              | 30.0              |                  |                              | 30.8              | 1.31             | br                           |
| <b>5'</b>                              | 29.9              | 1.32             | br                           | 30.6              | 1.28             | br                           |
| <b>6'</b>                              | 29.6              |                  |                              | 30.4              | 1.26             | br                           |
| <b>7'</b>                              | 20.8              | 2.05             | br                           | 21.5              | 2.06             | br                           |
| <b>8'</b>                              | 132.2             |                  |                              | 132.7             |                  | br                           |
| <b>9'</b>                              | 130.6             | 5.33             | br                           | 131.2             | 5.36             |                              |
| <b>10'</b>                             | 25.8              | 2.79             | t (6.5)                      | 26.4              | 2.79             | br                           |
| <b>11'</b>                             | 128.5             |                  |                              | 129.2             |                  | br                           |
| <b>12'</b>                             | 128.5             | 5.33             | br                           | 129.2             | 5.31             |                              |
| <b>13'</b>                             | 25.8              | 2.79             | t (7.0)                      | 26.0              | 2.79             | br                           |
| <b>14'</b>                             | 127.9             |                  |                              | 128.2             | 5.30             | br                           |
| <b>15'</b>                             | 127.3             | 5.33             | br                           | 128.2             | 5.27             | br                           |
| <b>16'</b>                             | 27.5              | 2.05             | br                           | 28.2              | 2.07             | br                           |
| <b>17'</b>                             | 14.49             | 0.95             | t (6.5)                      | 14.7              | 0.95             | br                           |

s: singlet; d: doublet; dd: doublet of doublet; m: multiplet; t: triplet; q: quartet; qu: quintet; br: broad

**Table S6.** Comparison of NMR chemical shifts of **5** with reported compound, 6-heptadeca-9Z,12Z-dienyl salicylic acid [19].

| <sup>13</sup> C | Compound <b>5</b> in CDCl <sub>3</sub> |                  |                              | 6-[(9Z,12Z)-heptadeca dienyl]salicylic acid |                  |                              |
|-----------------|----------------------------------------|------------------|------------------------------|---------------------------------------------|------------------|------------------------------|
|                 | δ <sup>13</sup> C                      | δ <sup>1</sup> H | Multiplicity<br>(J in Hertz) | δ <sup>13</sup> C                           | Δ <sup>1</sup> H | Multiplicity<br>(J in Hertz) |
| <b>1</b>        | 111.7                                  |                  |                              | 110.68                                      |                  |                              |
| <b>2</b>        | 163.4                                  |                  |                              | 163.48                                      |                  |                              |
| <b>3</b>        | 115.6                                  | 6.79             | d (7.5)                      | 115.79                                      | 6.85             | dd (7.9,1.0)                 |
| <b>4</b>        | 134.5                                  | 7.26             | t (7.5)                      | 135.21                                      | 7.34             | t (7.9)                      |
| <b>5</b>        | 122.5                                  | 6.69             | d (7.5)                      | 122.67                                      | 6.76             | dd (7.9,1.0)                 |
| <b>6</b>        | 147.3                                  |                  |                              | 147.61                                      |                  |                              |
| <b>7</b>        | 174.1                                  |                  |                              | 175.64                                      |                  |                              |
| <b>1'</b>       | 36.6                                   | 2.92             | t (8.0)                      | 36.41                                       | 2.97             | t (7.6)                      |
| <b>2'</b>       | 32.3                                   |                  |                              | 31.97                                       |                  |                              |
| <b>3'</b>       | 31.7                                   | 1.54             | qu (7.5)                     | 31.50                                       | 1.60             | qu (7.6)                     |
| <b>4'</b>       | 30.0                                   |                  |                              | 29.74                                       |                  |                              |
| <b>5'</b>       | 29.9                                   |                  |                              | 29.64                                       |                  |                              |
| <b>6'</b>       | 29.6                                   | 1.28             | br                           | 29.37                                       | 1.31             | br                           |
| <b>7'</b>       | 29.5                                   |                  |                              | 29.33                                       |                  |                              |
| <b>8'</b>       | 27.4                                   | 2.01             | q (7.0)                      | 27.18                                       | 2.04             | br                           |
| <b>9'</b>       | 130.4                                  |                  |                              | 130.19                                      |                  |                              |
| <b>10'</b>      | 130.3                                  | 5.32             | br                           | 130.19                                      | 5.35             | br                           |
| <b>11'</b>      | 25.8                                   | 2.74             | t (6.5)                      | 25.61                                       | 2.77             | t (5.6)                      |
| <b>12'</b>      | 128.2                                  |                  |                              | 127.94                                      |                  |                              |
| <b>13'</b>      | 128.1                                  | 5.32             | br                           | 127.94                                      | 5.35             | br                           |
| <b>14'</b>      | 27.4                                   | 2.01             | q (7.0)                      | 27.39                                       | 2.04             | br                           |
| <b>15'</b>      | 29.5                                   |                  |                              | 29.24                                       |                  |                              |
| <b>16'</b>      | 22.8                                   | 1.28             | br                           | 22.46                                       | 1.31             | br                           |
| <b>17'</b>      | 14.2                                   | 0.85             | t (6.5)                      | 14.05                                       | 0.88             | t (7.0)                      |
| <b>OH</b>       |                                        |                  |                              |                                             | 10.84            | t                            |

s: singlet; d: doublet; dd: doublet of doublet; m: multiplet; t: triplet; q: quartet; qu: quintet; br: broad
